# Supplementary material for: RETRACTED: Comprehensive Logic Based Analyses of Toll-Like Receptor 4 Signal Transduction Pathway
Source: PubMed Central journal article supplement (PMC3974726; doi:10.1371/journal.pone.0092481), 2014-04-03

MKP1 -/-

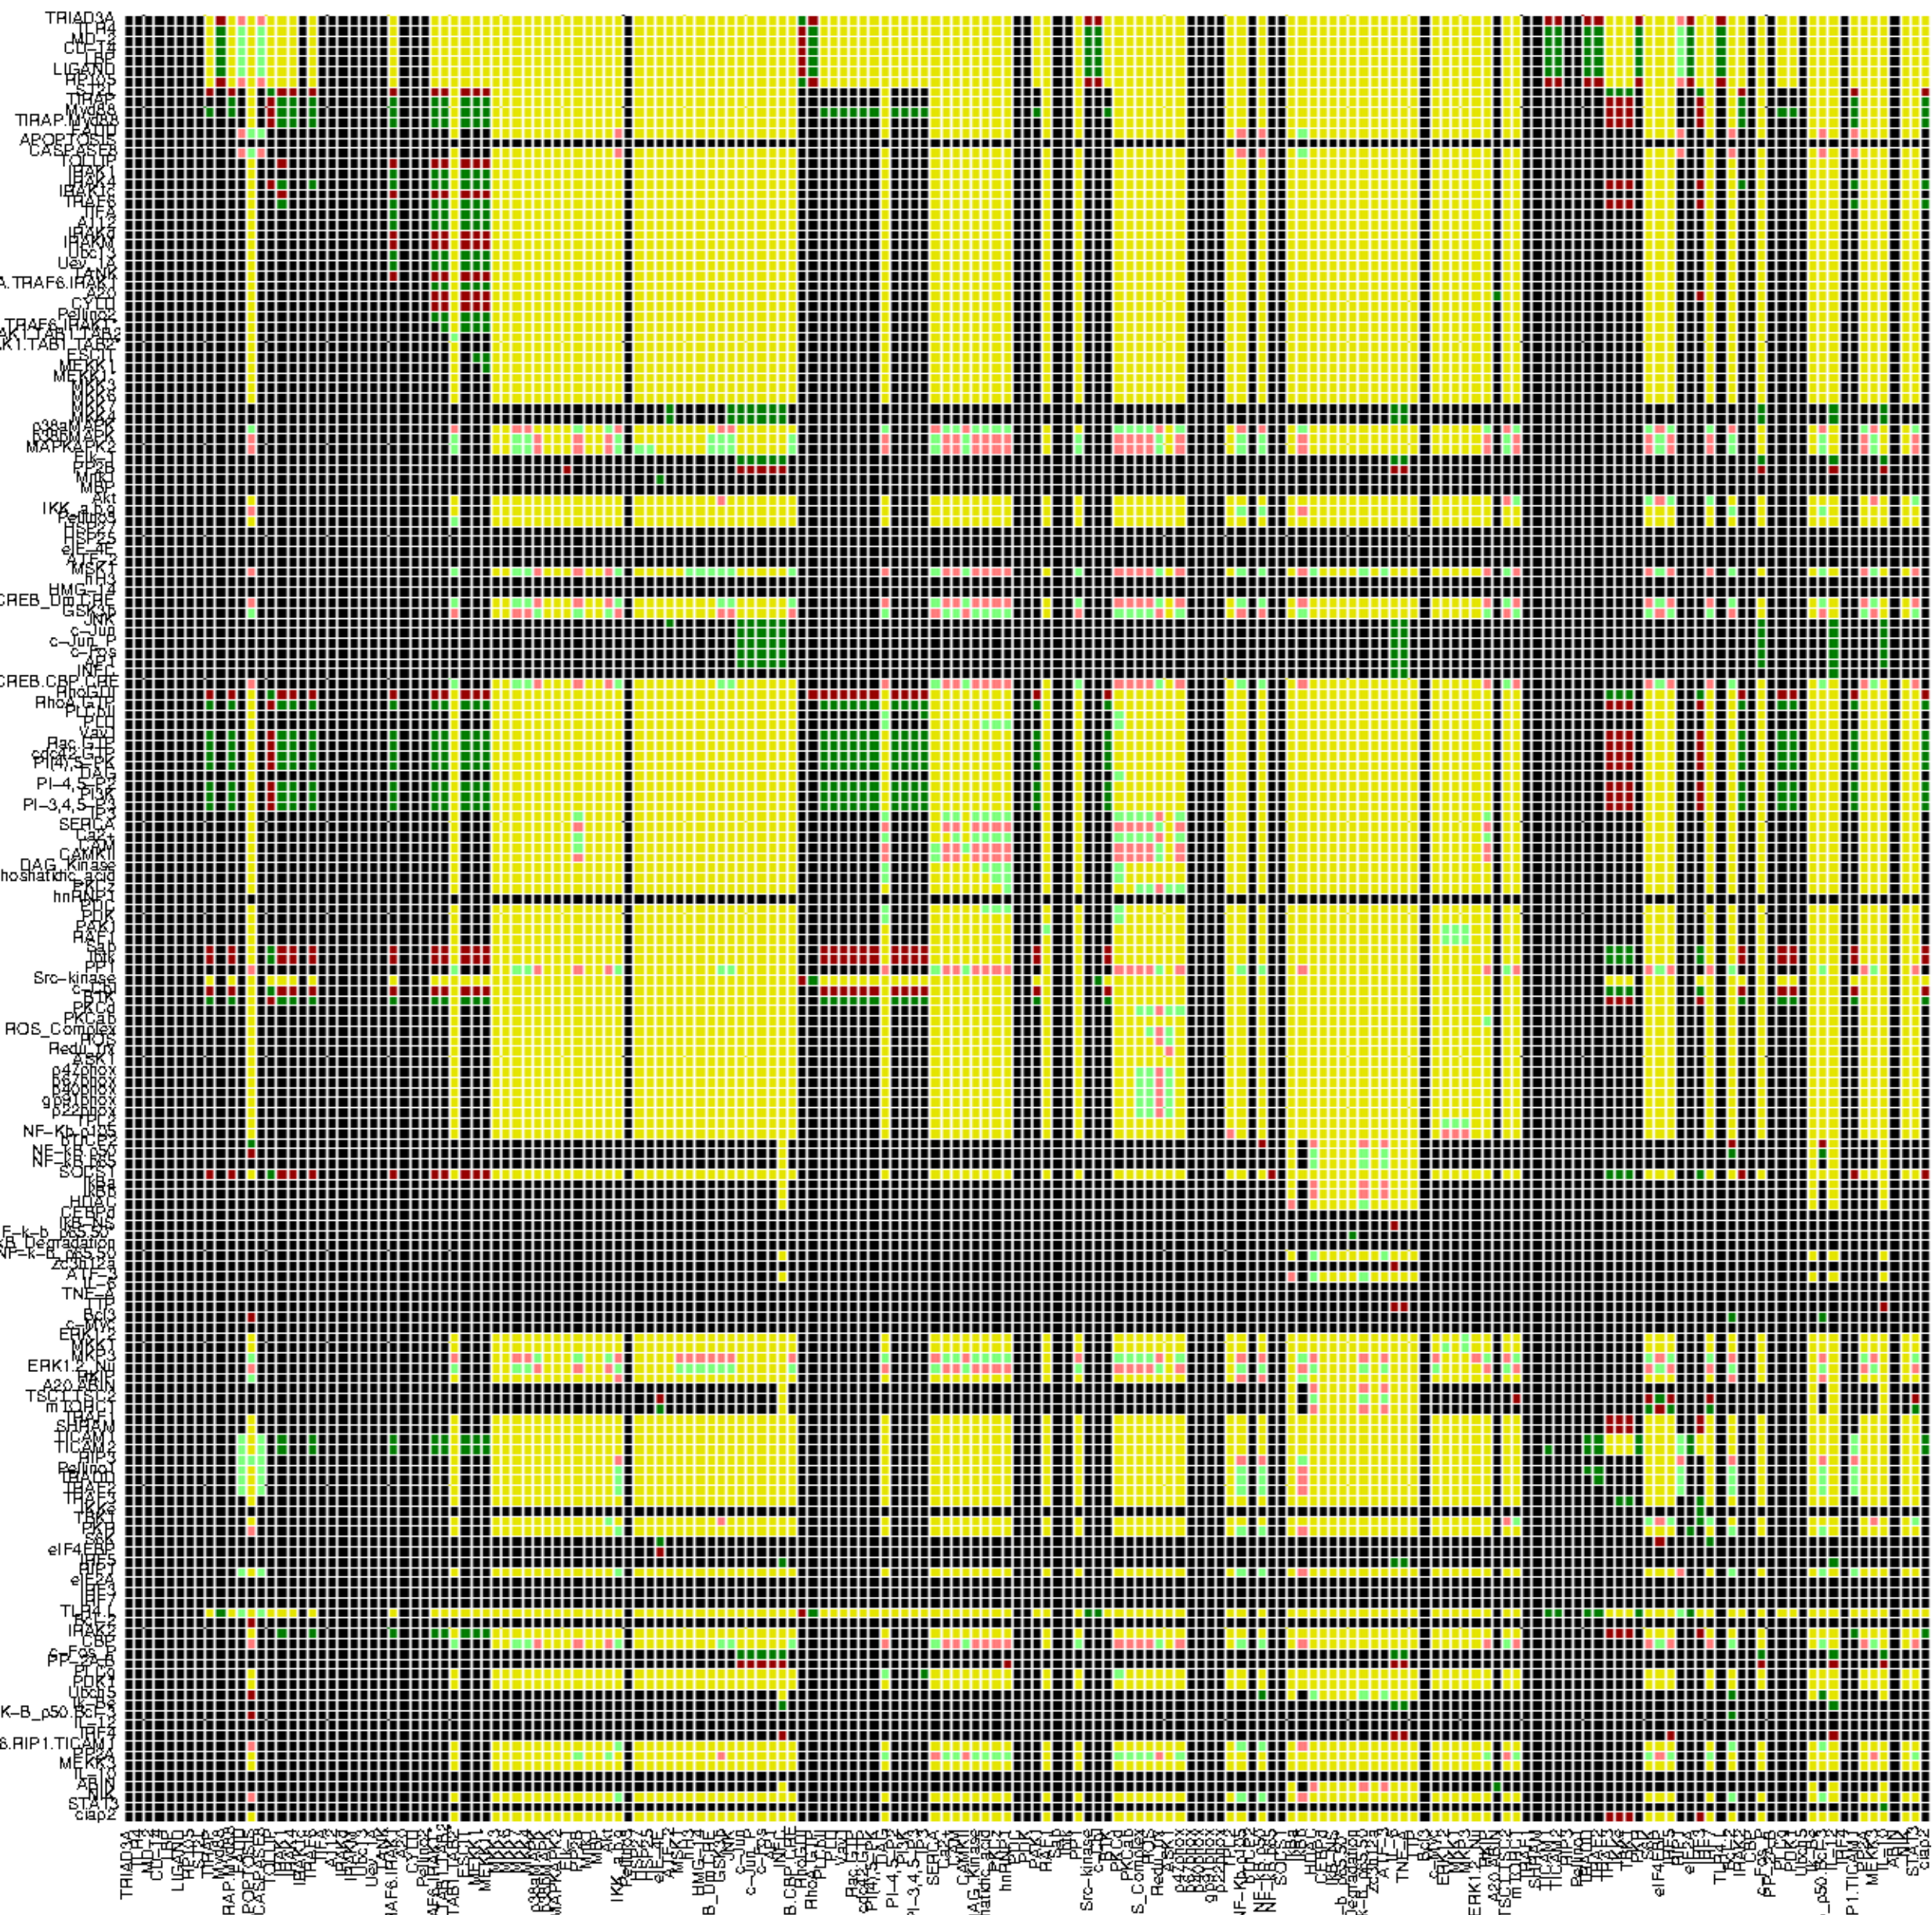

PP2A -/-

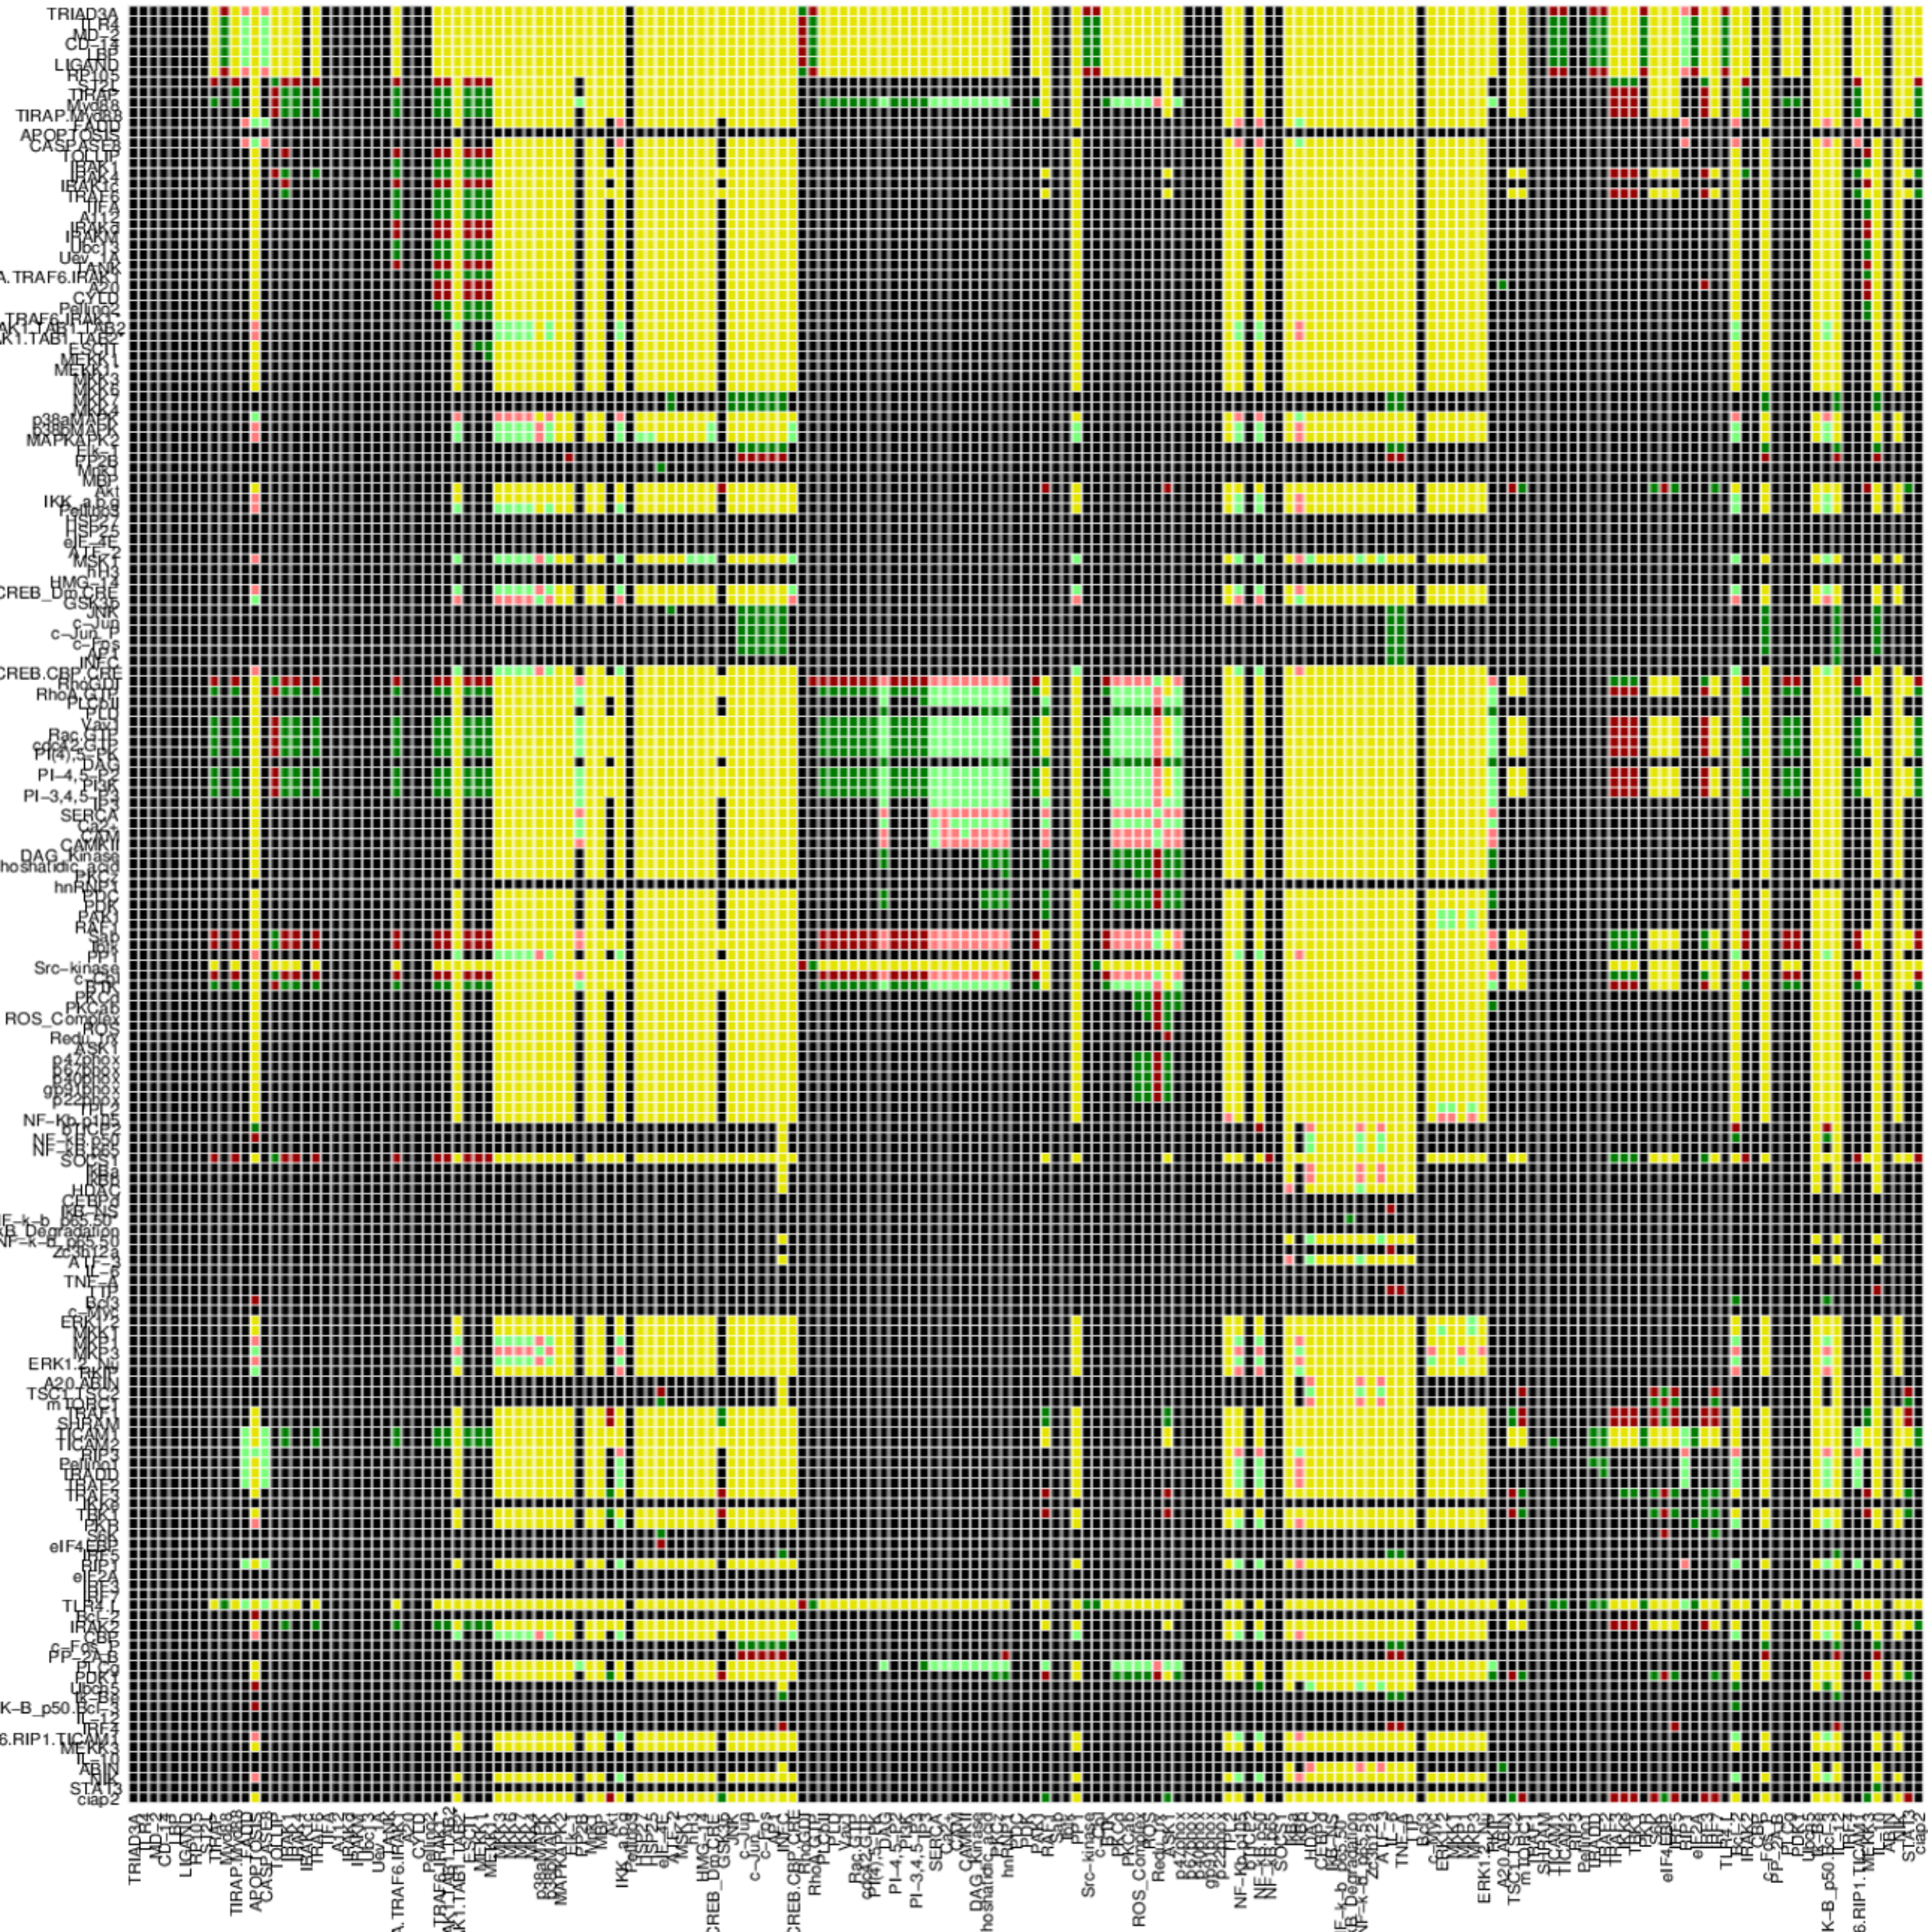



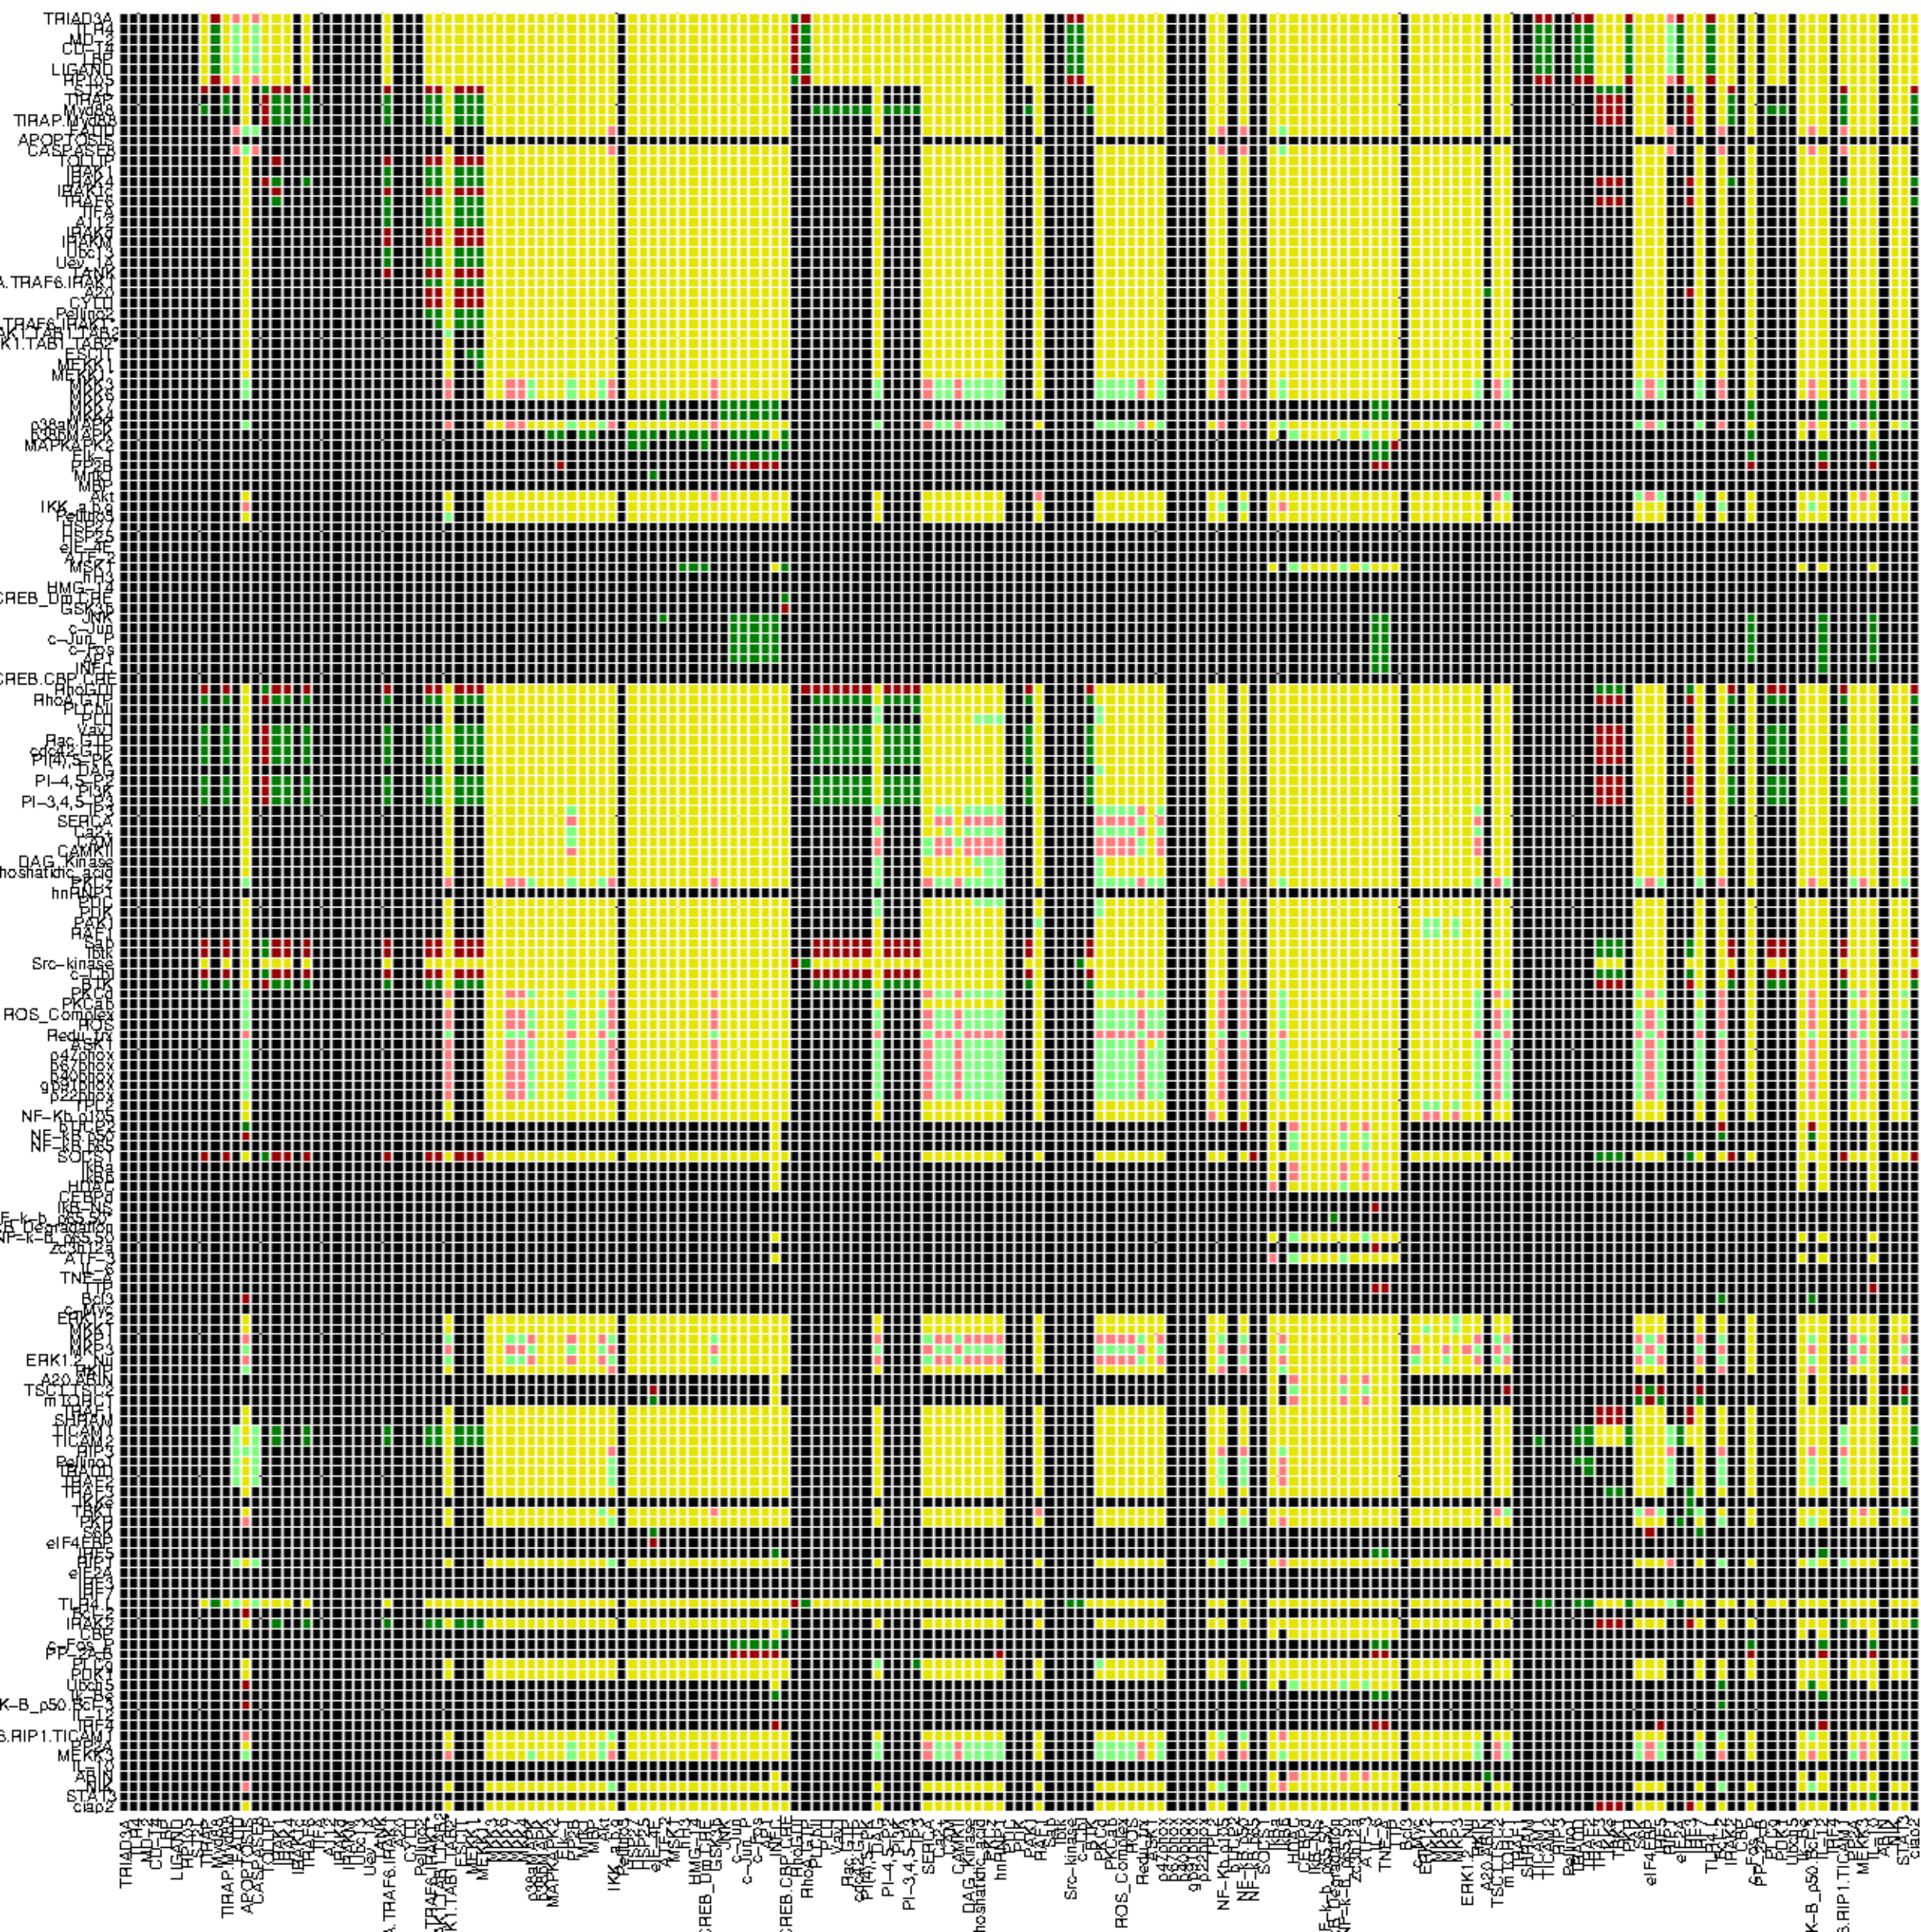

(MKP1+PP2A) -/-

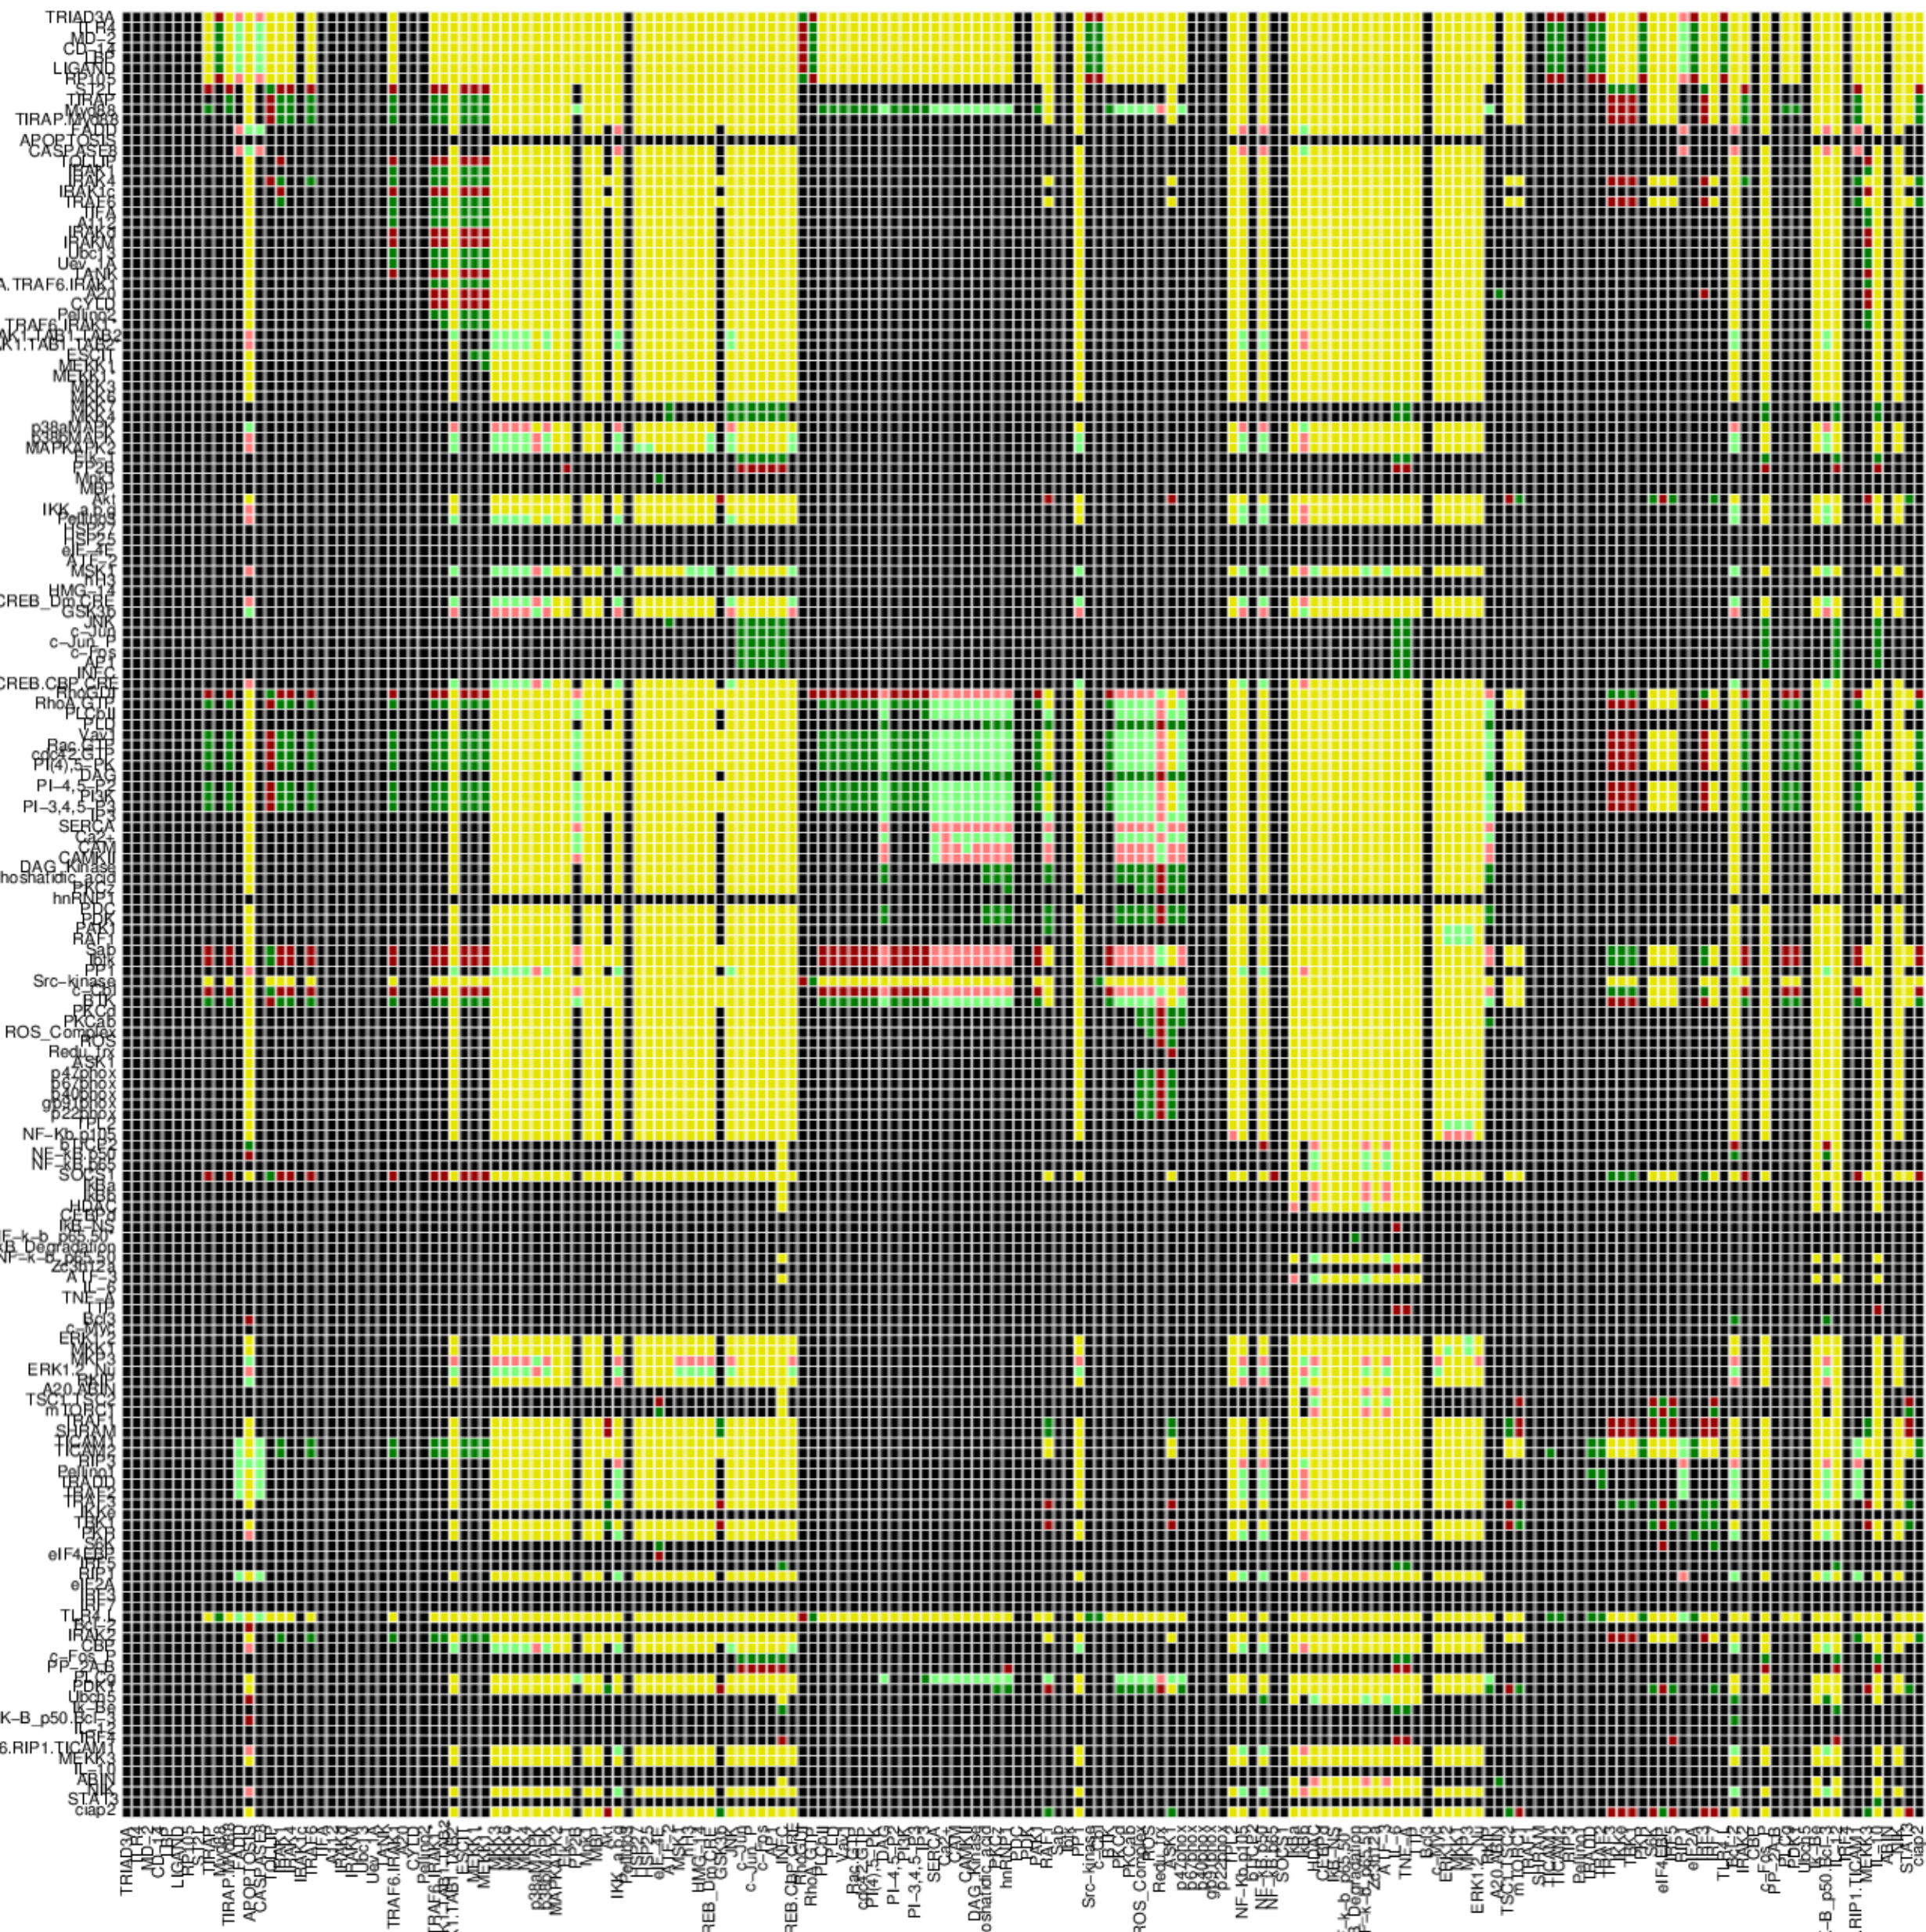



(MKP3+MKP1) -/-

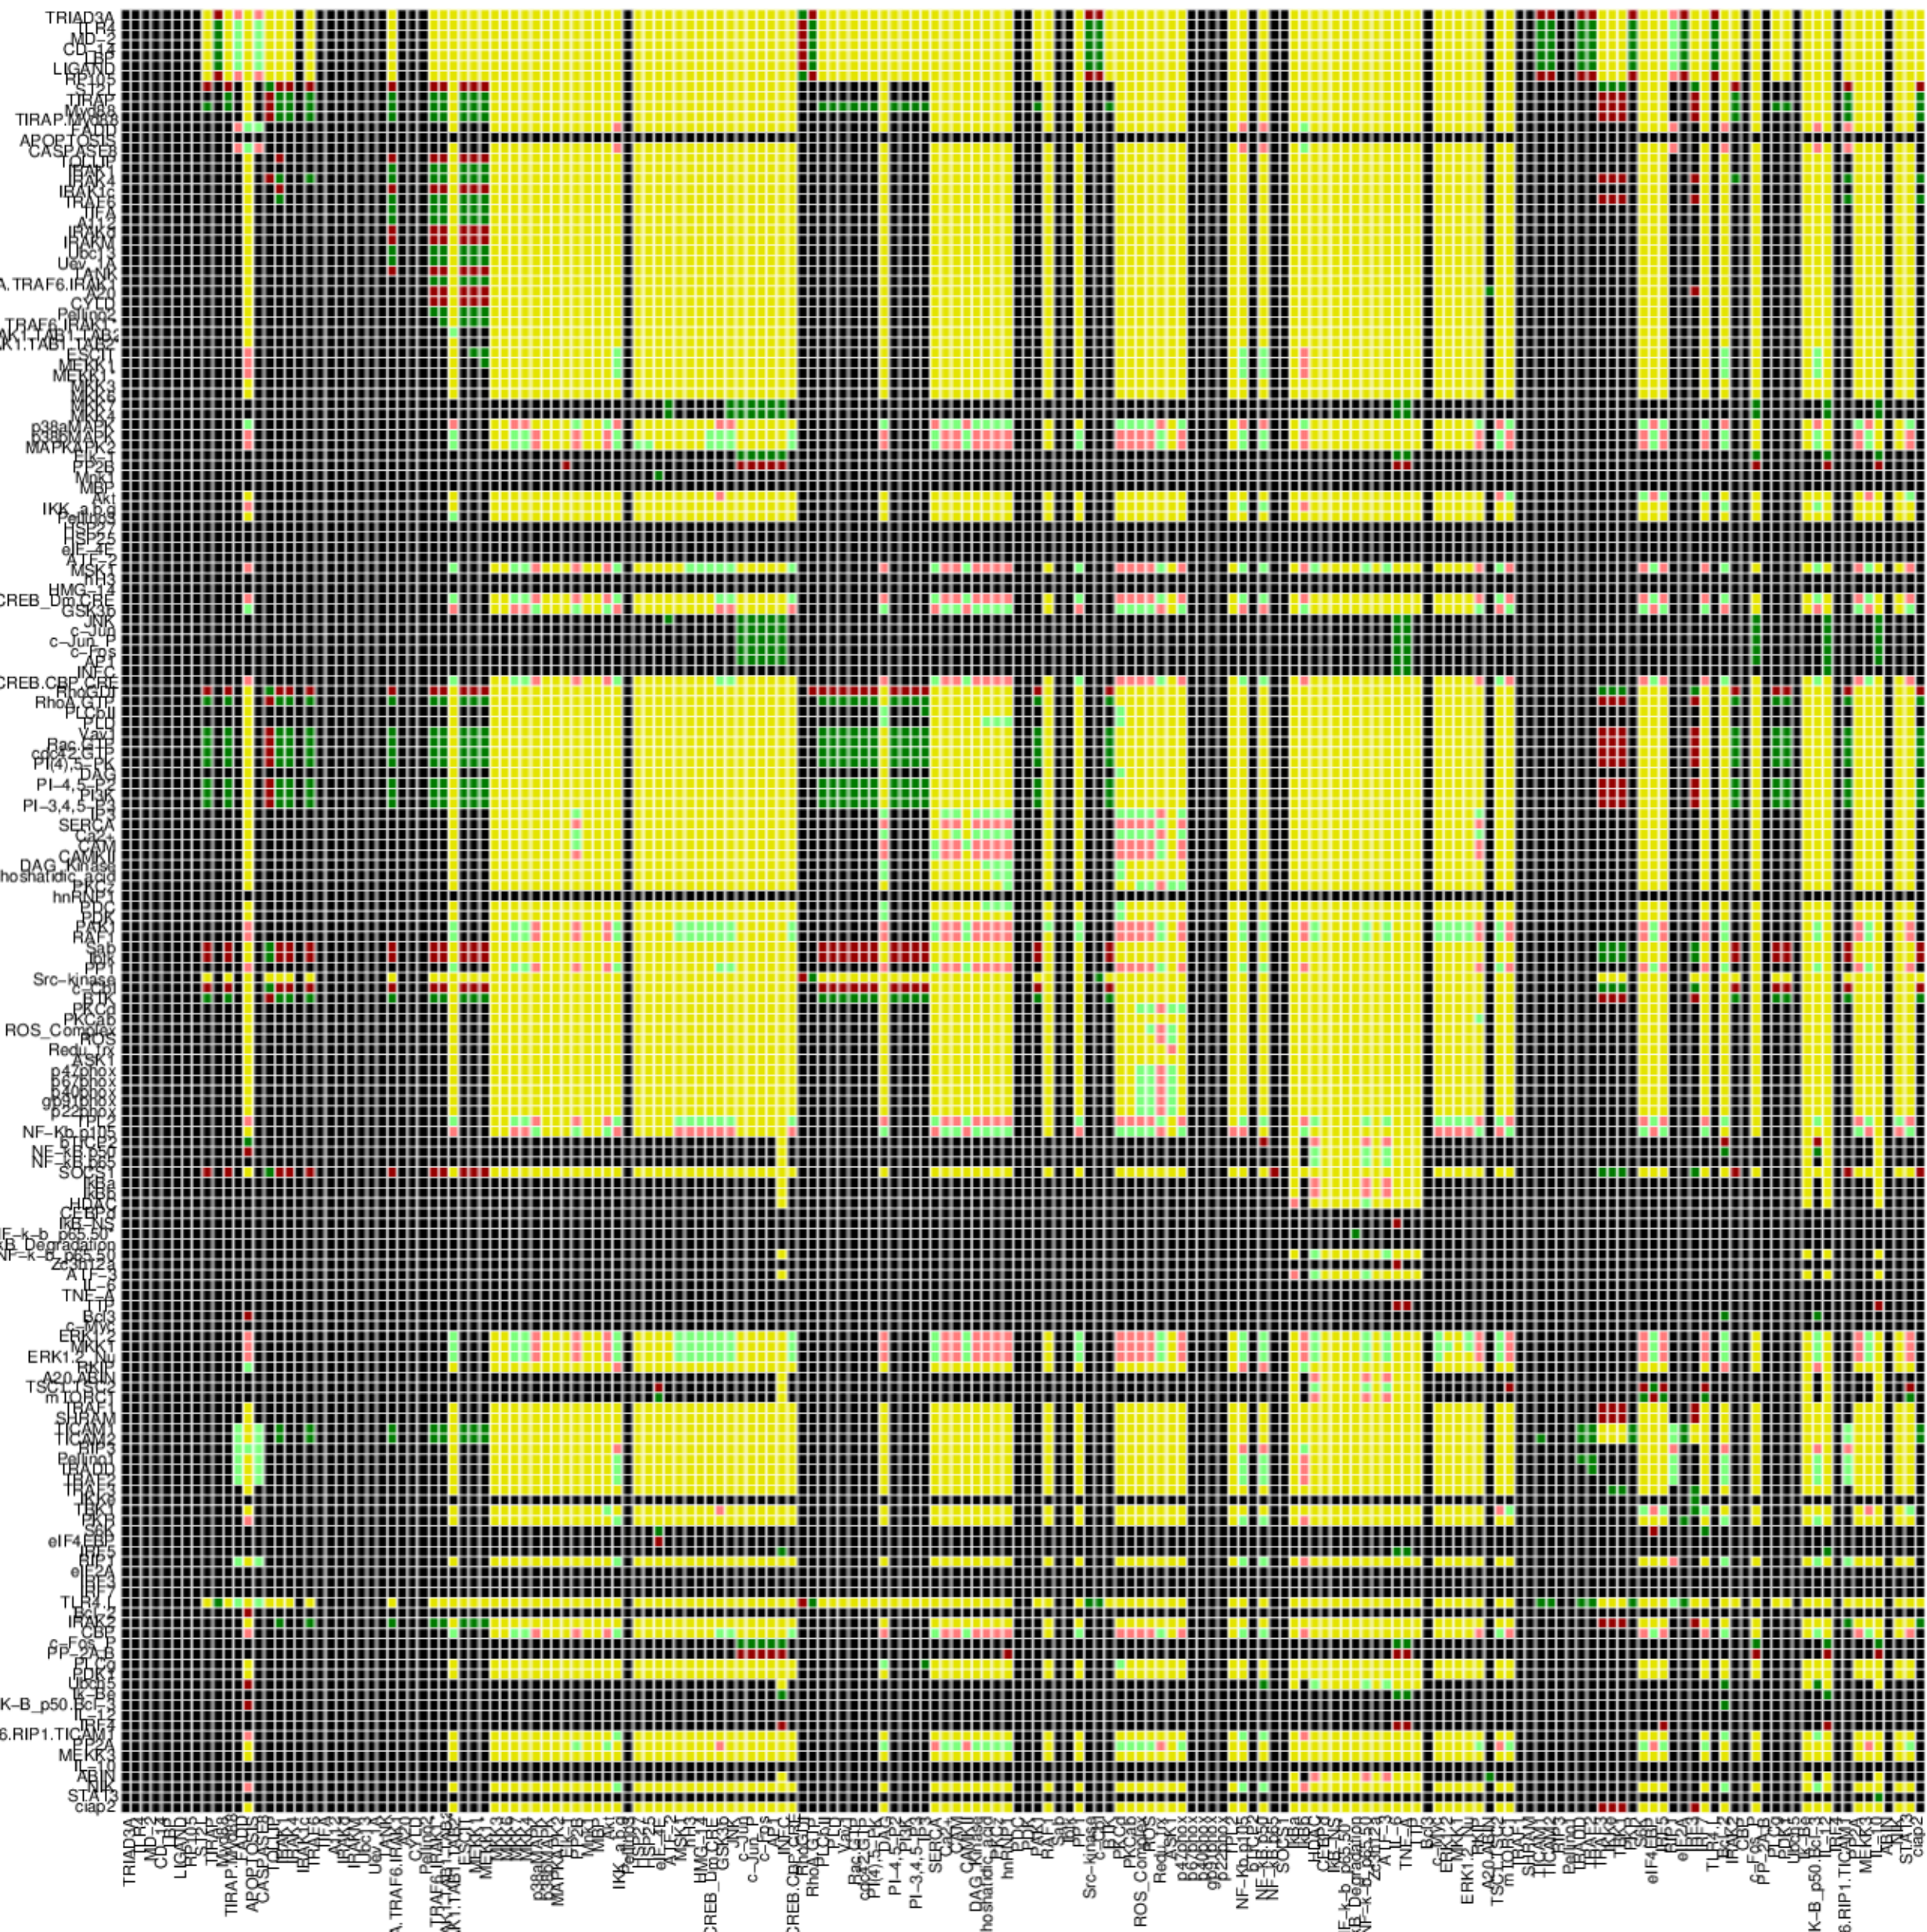



(PP1+PP2A) -/-

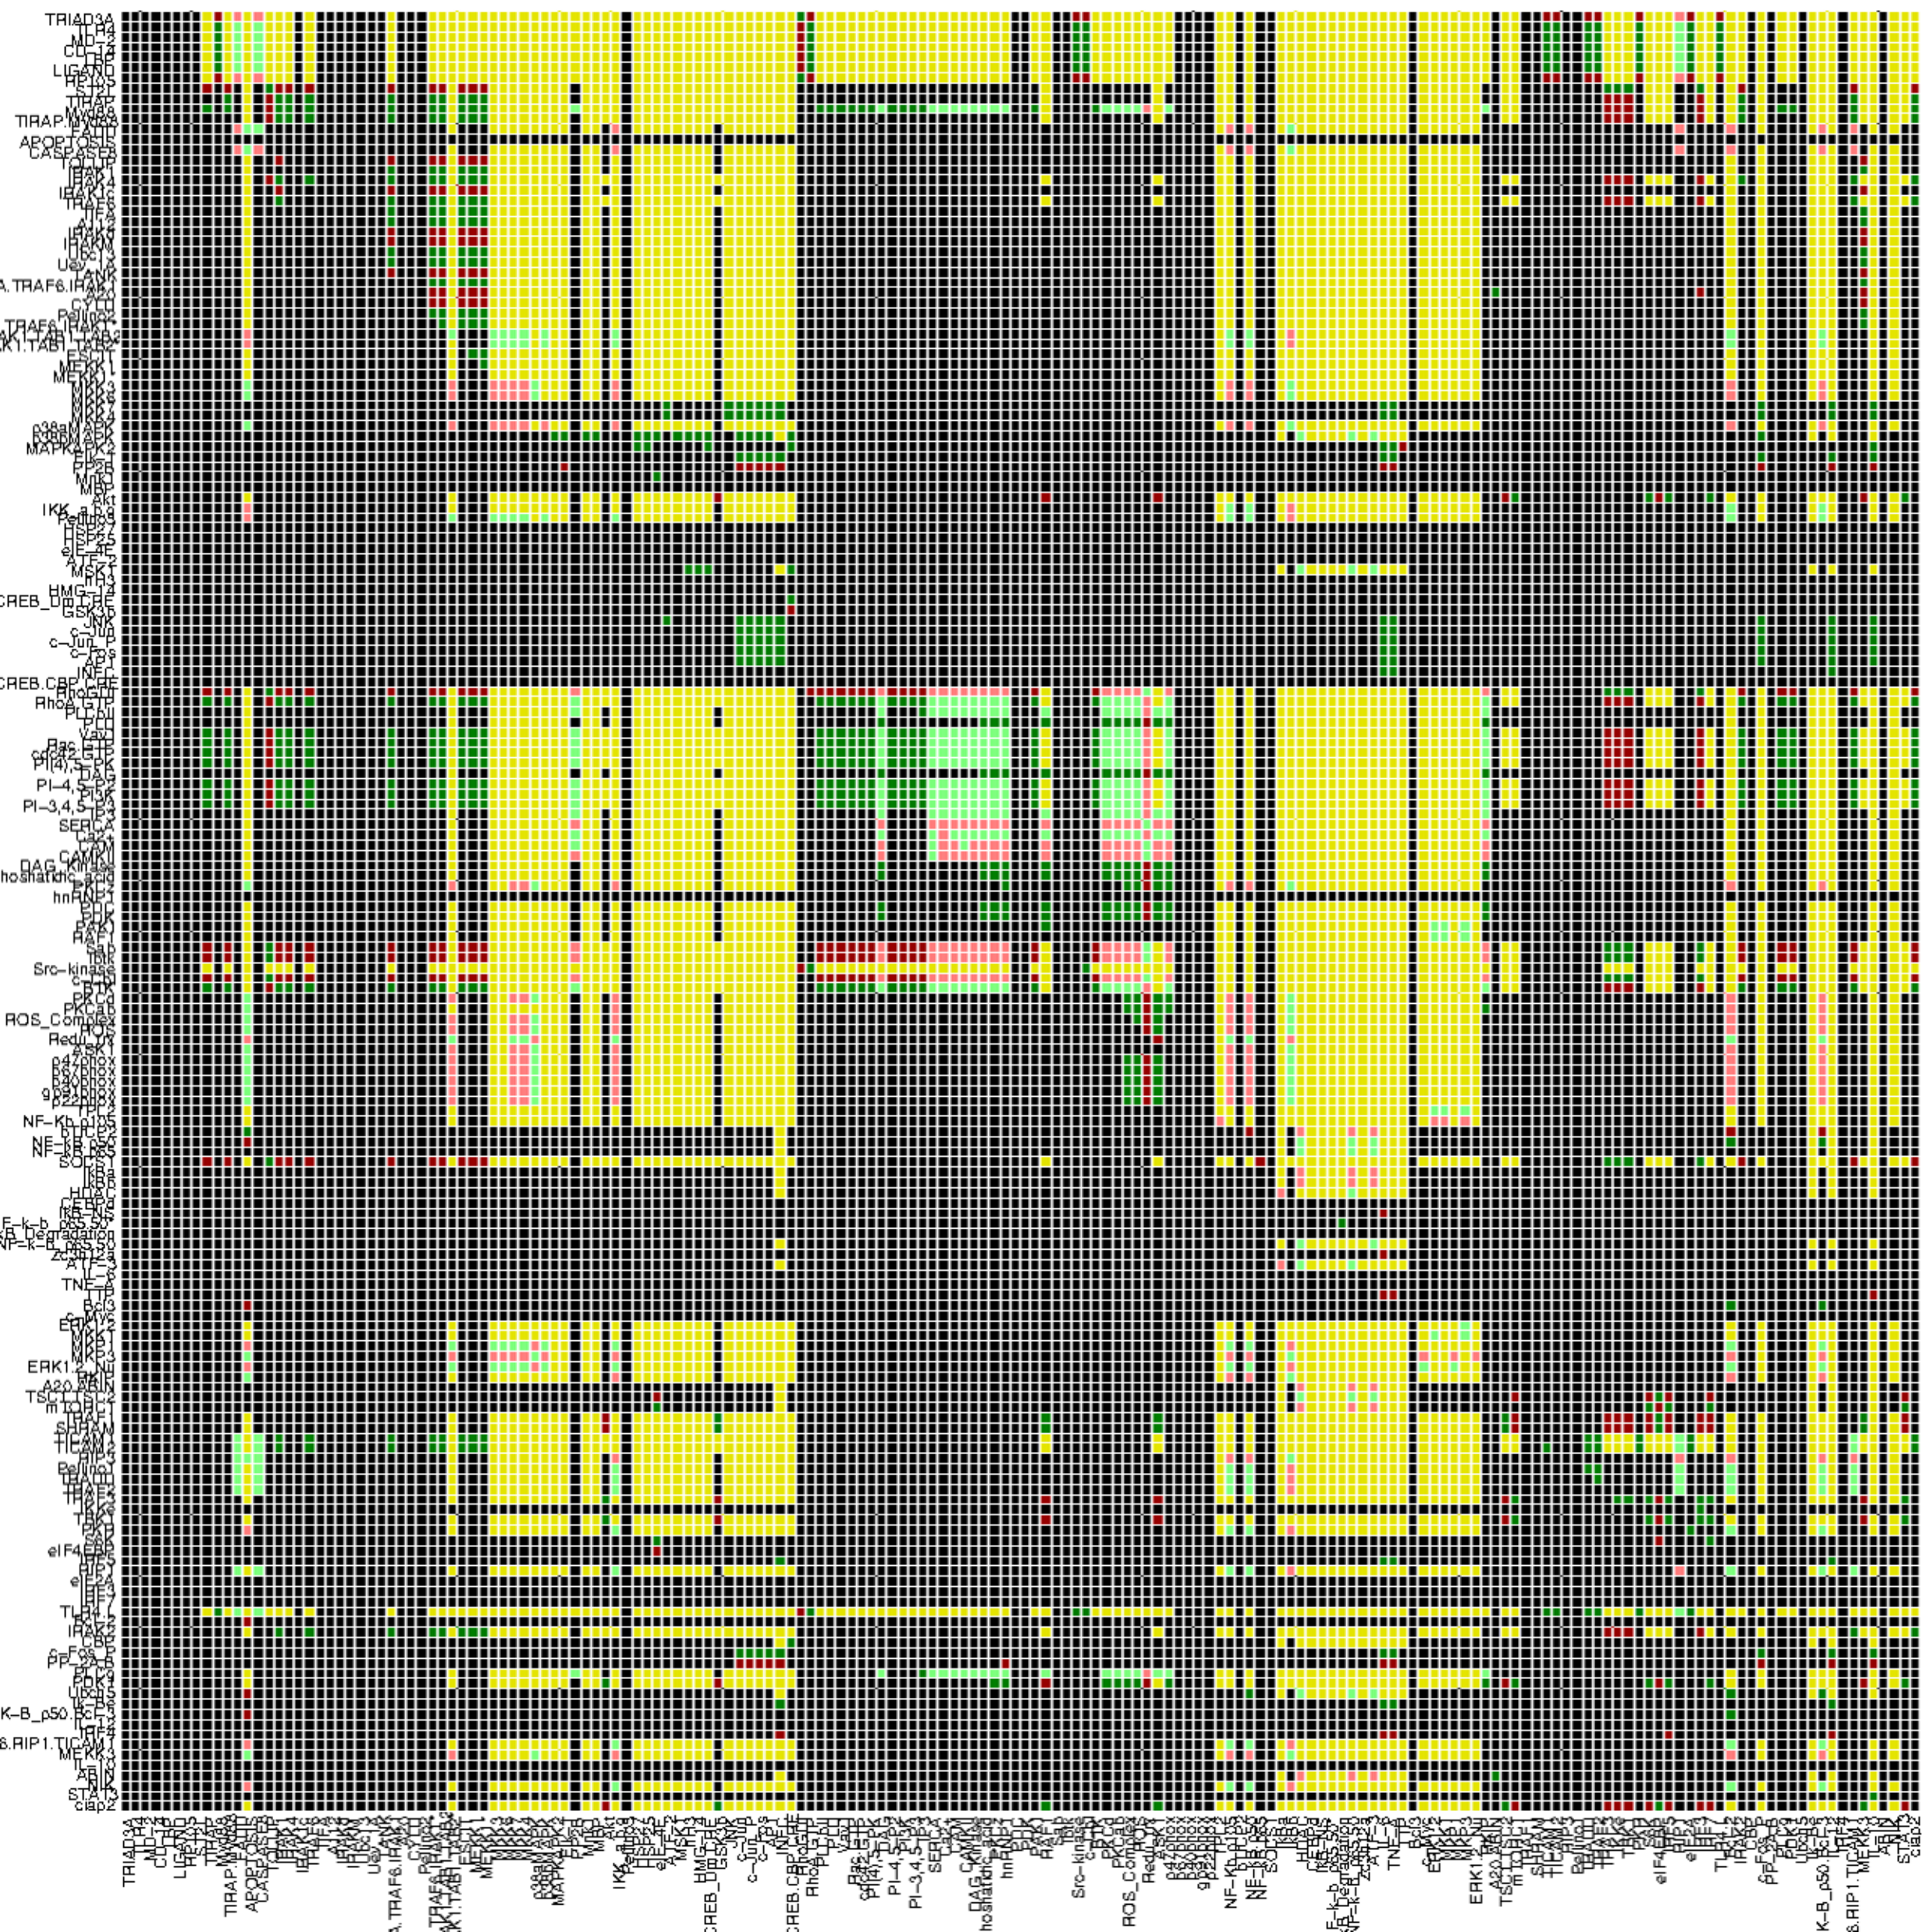

(MKP3+PP1) -/-

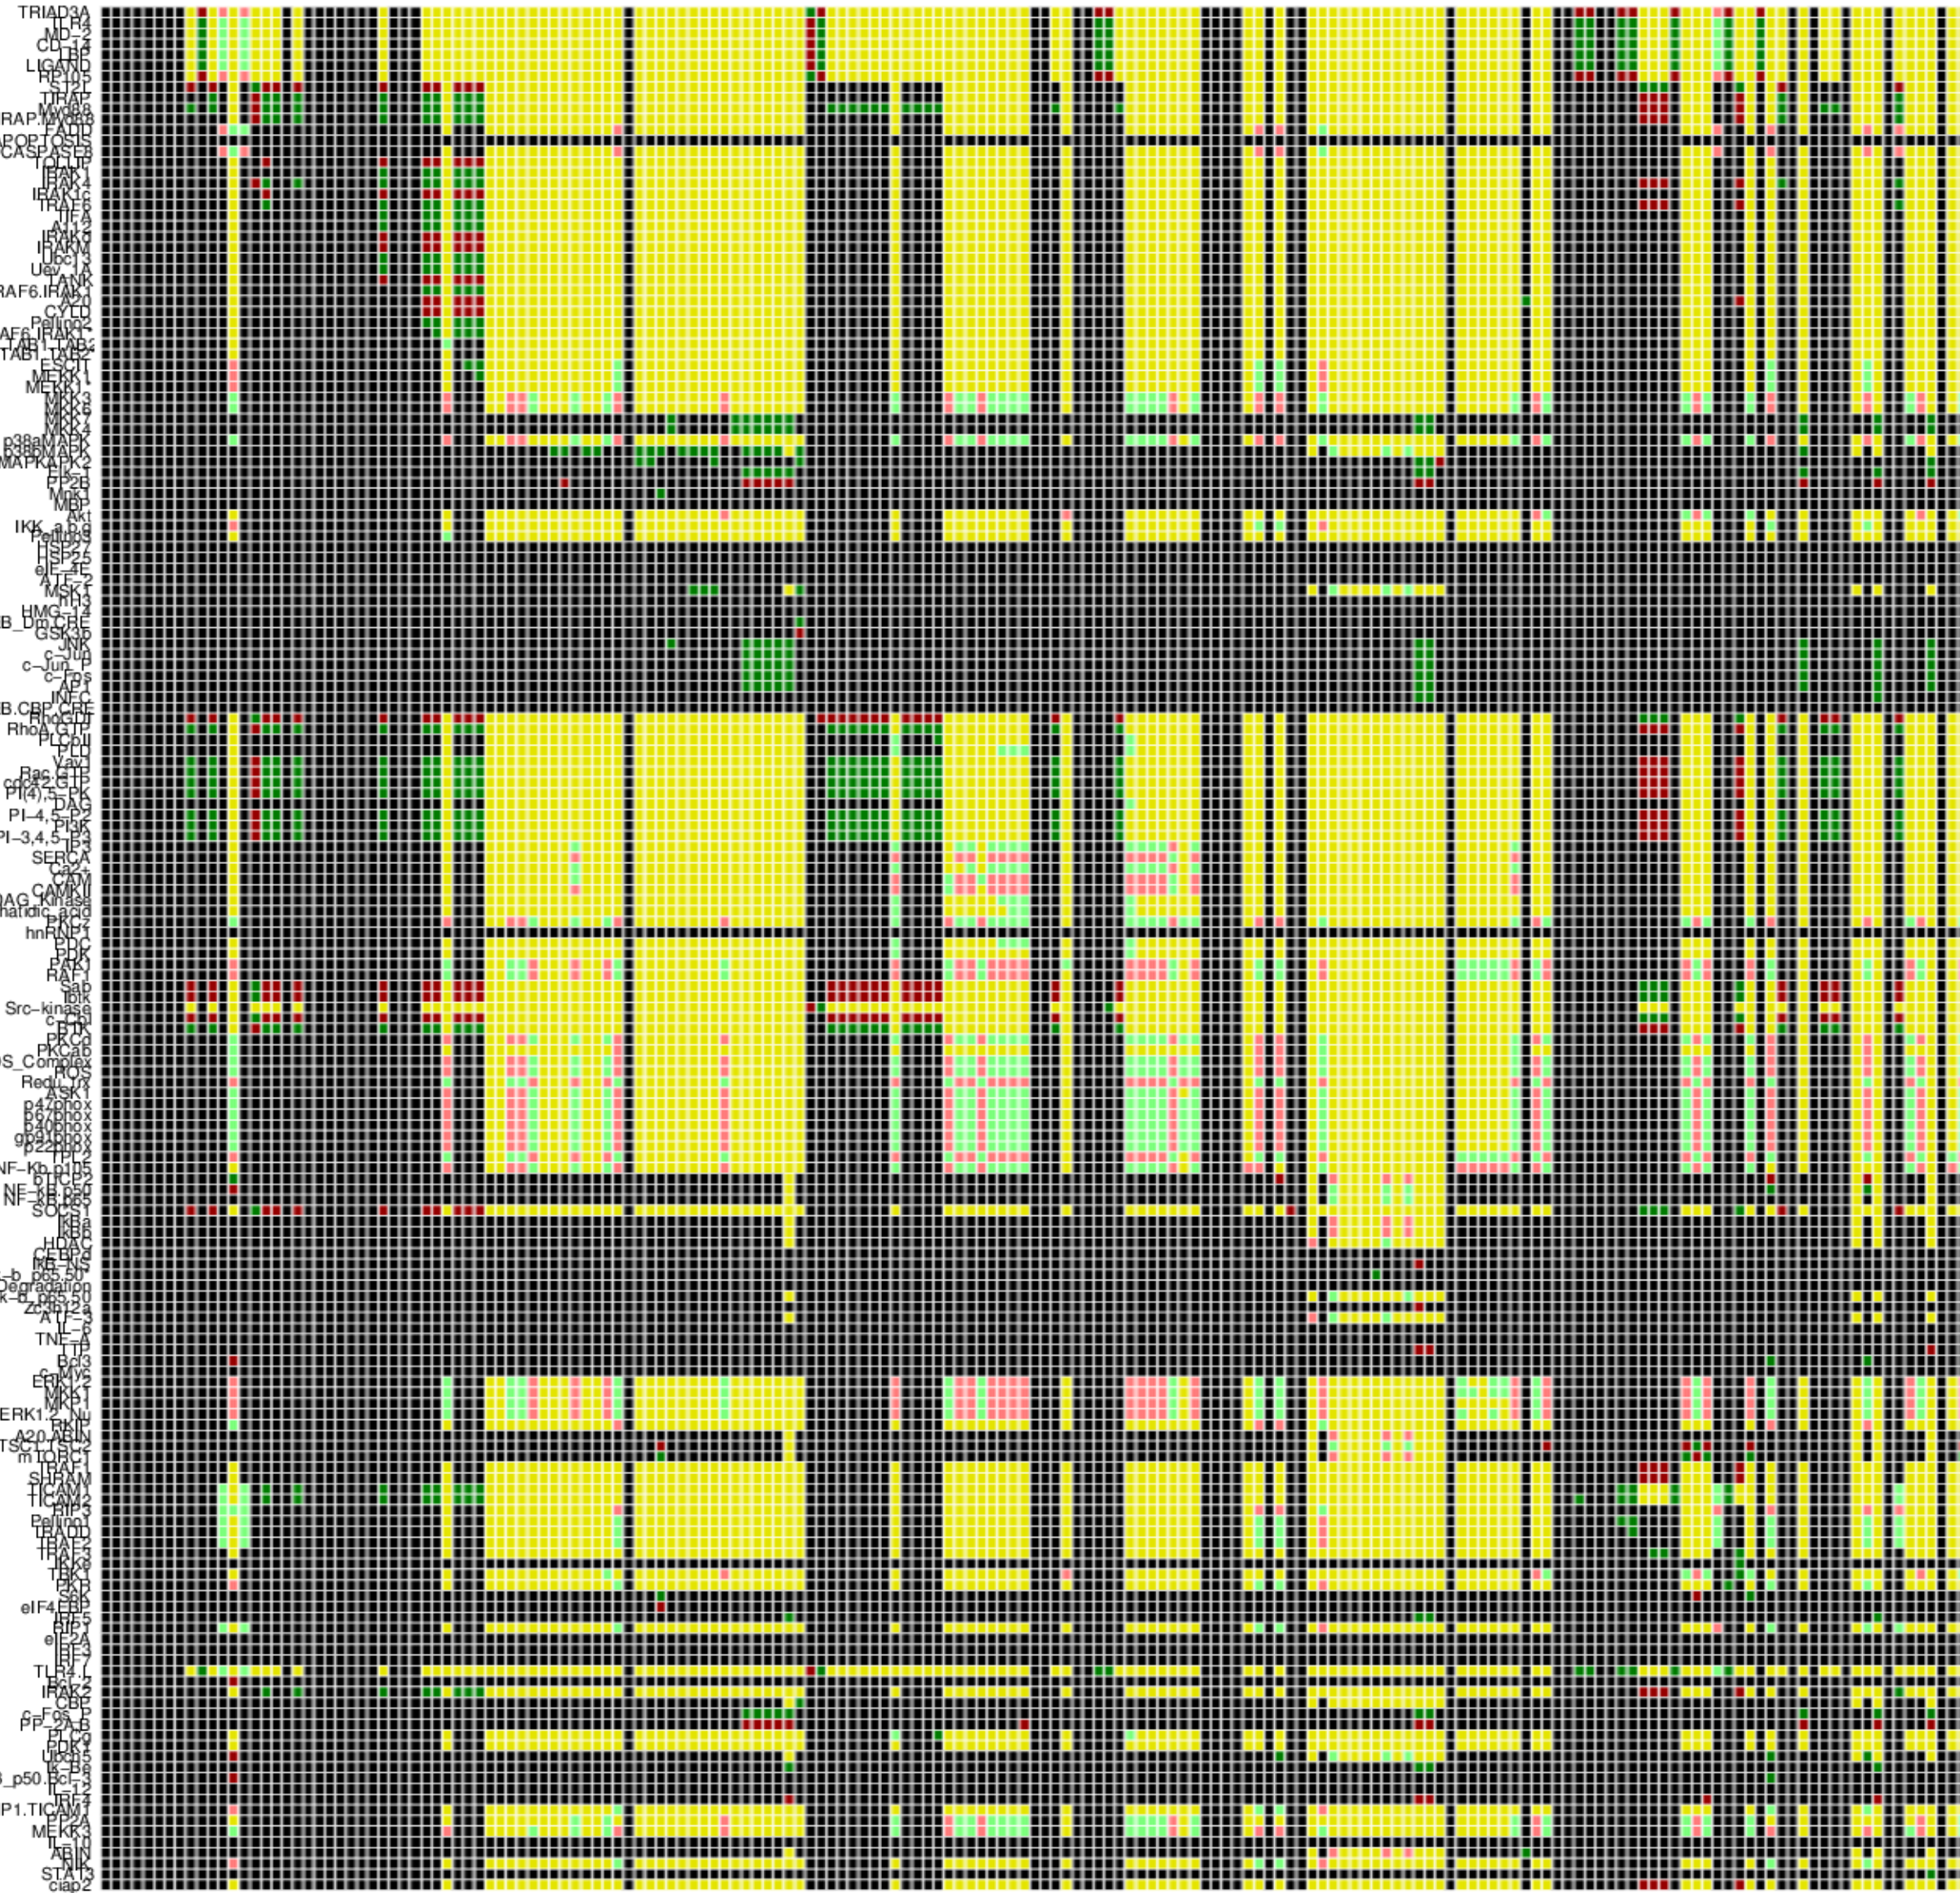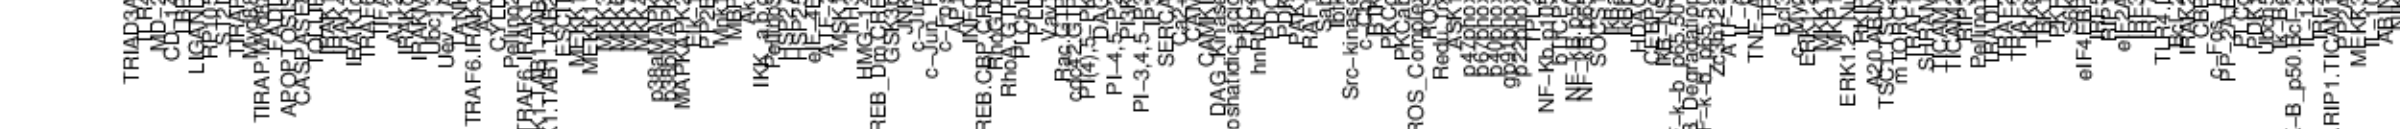

(MKP3+PP2A) -/-

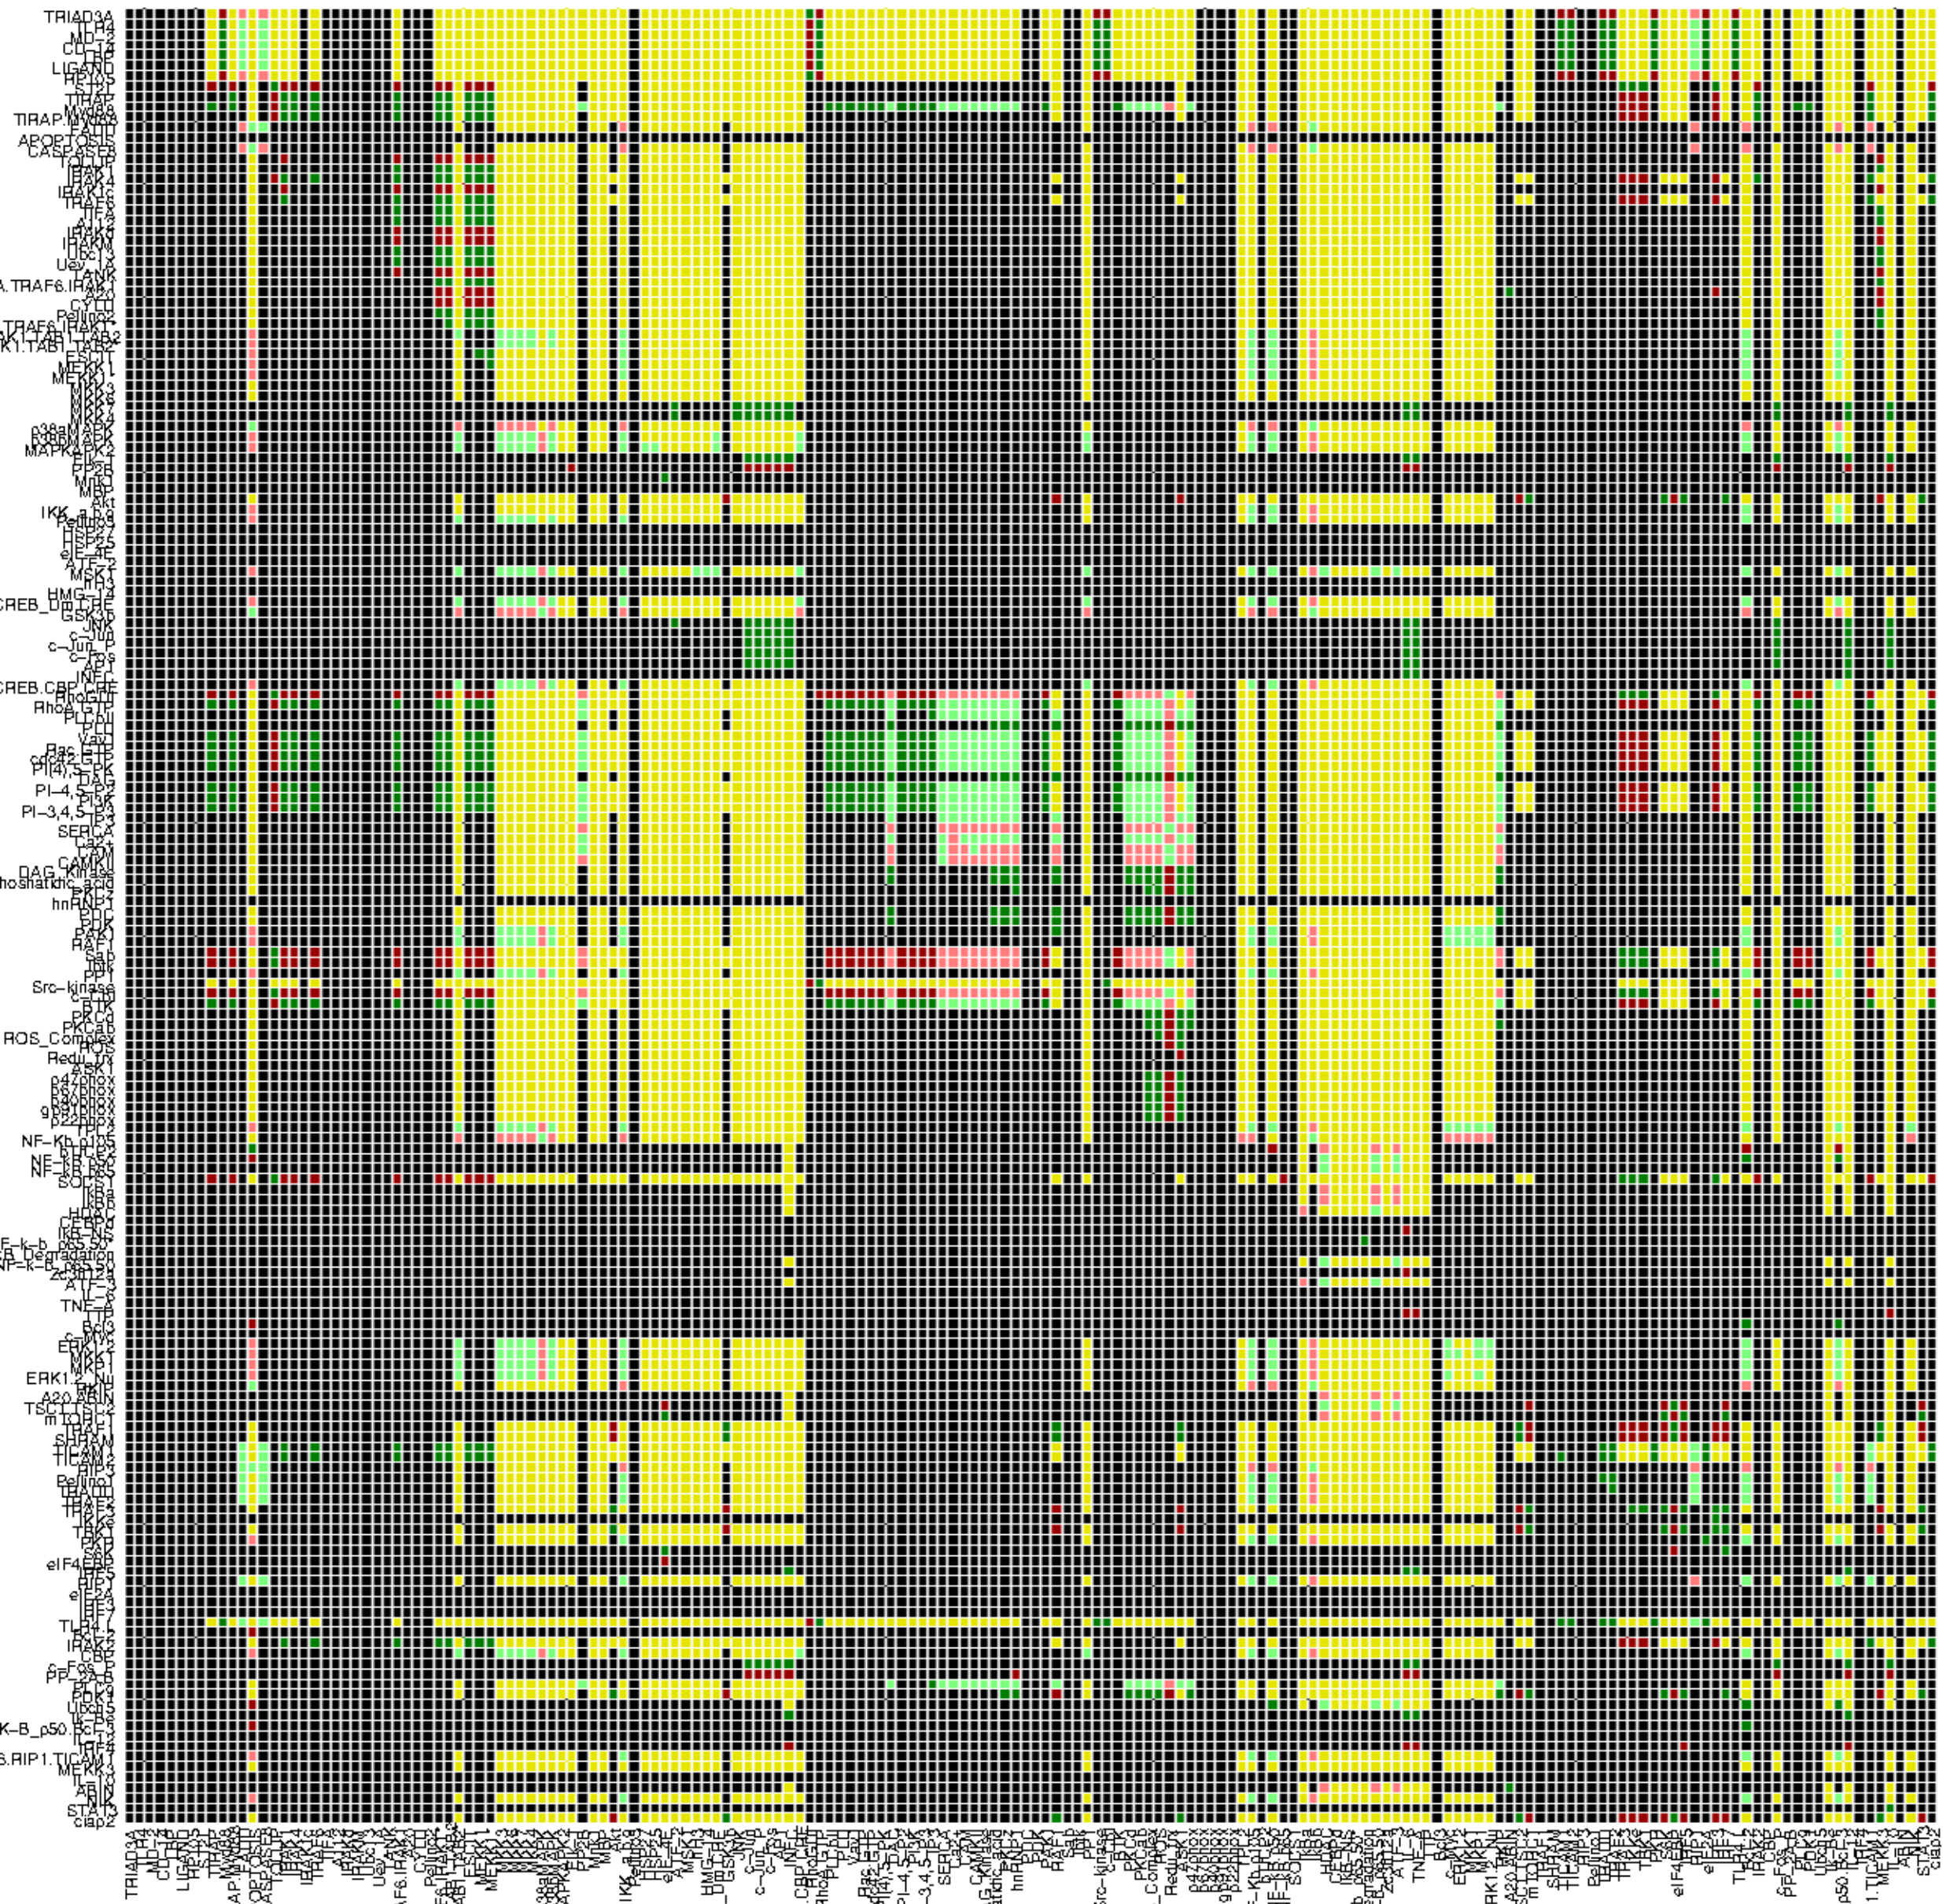

(PP1+MKP1+MKP3) -/-

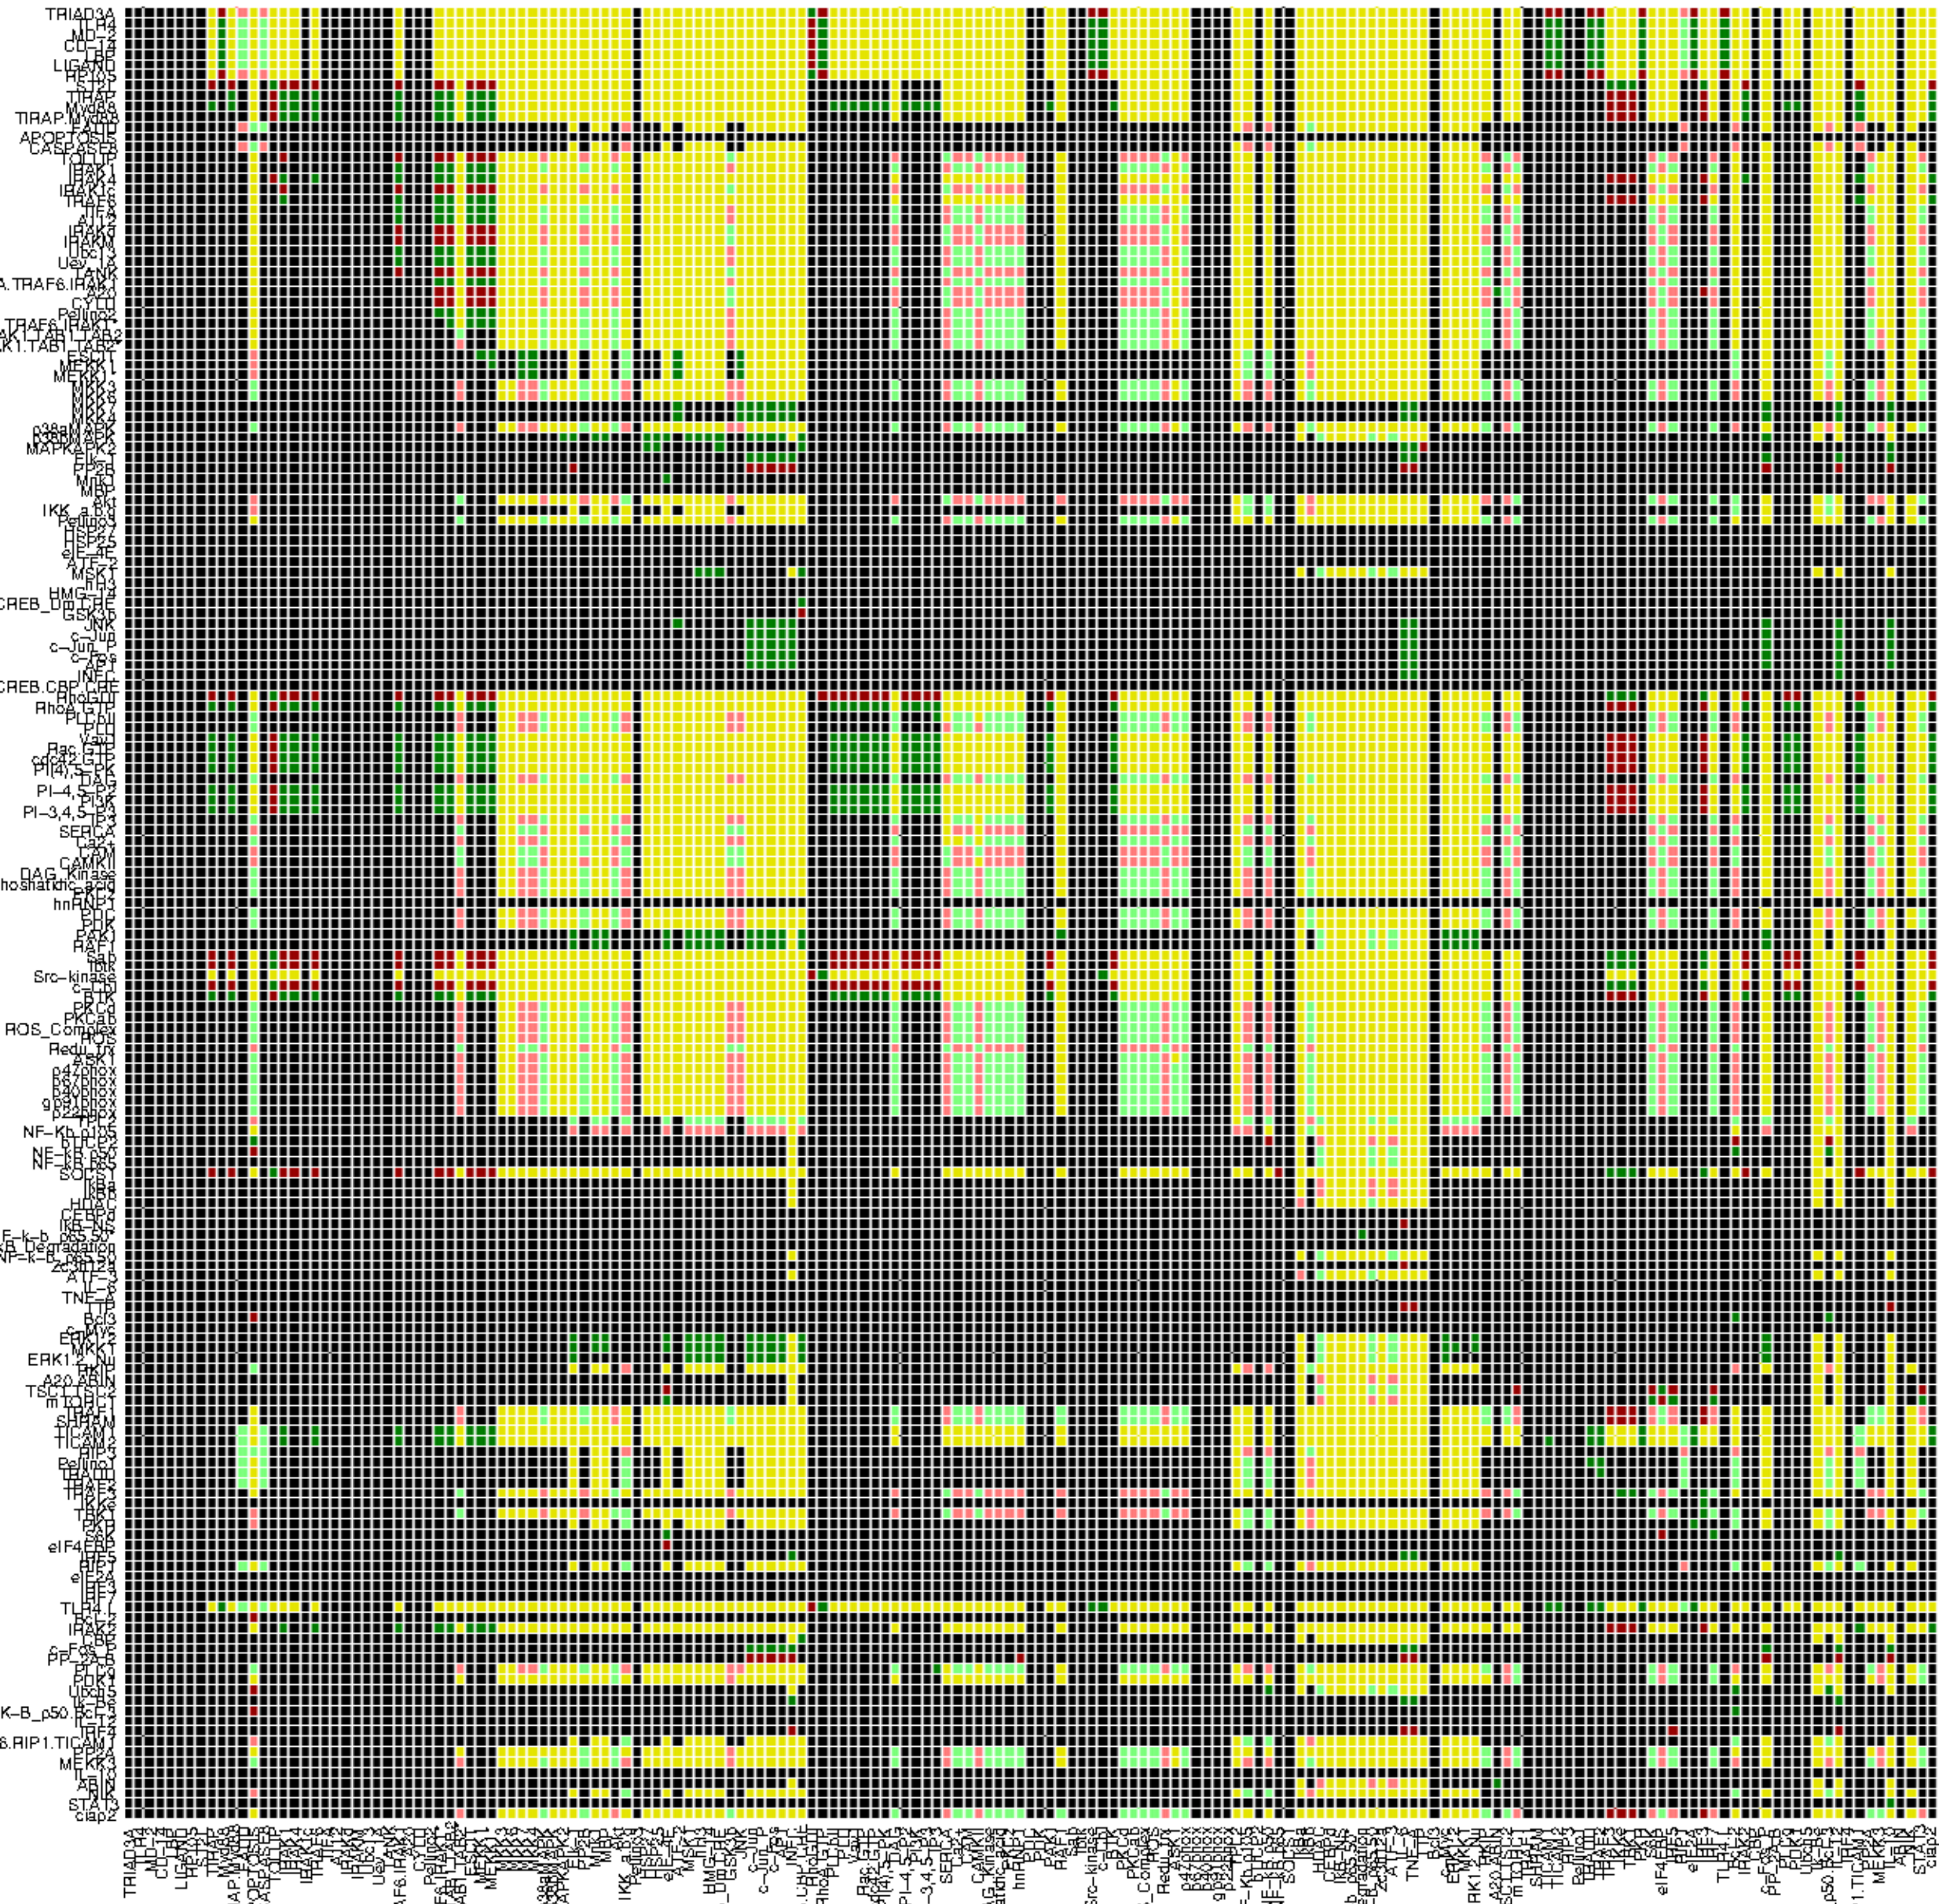

(PP1+PP2A+MKP1) -/-

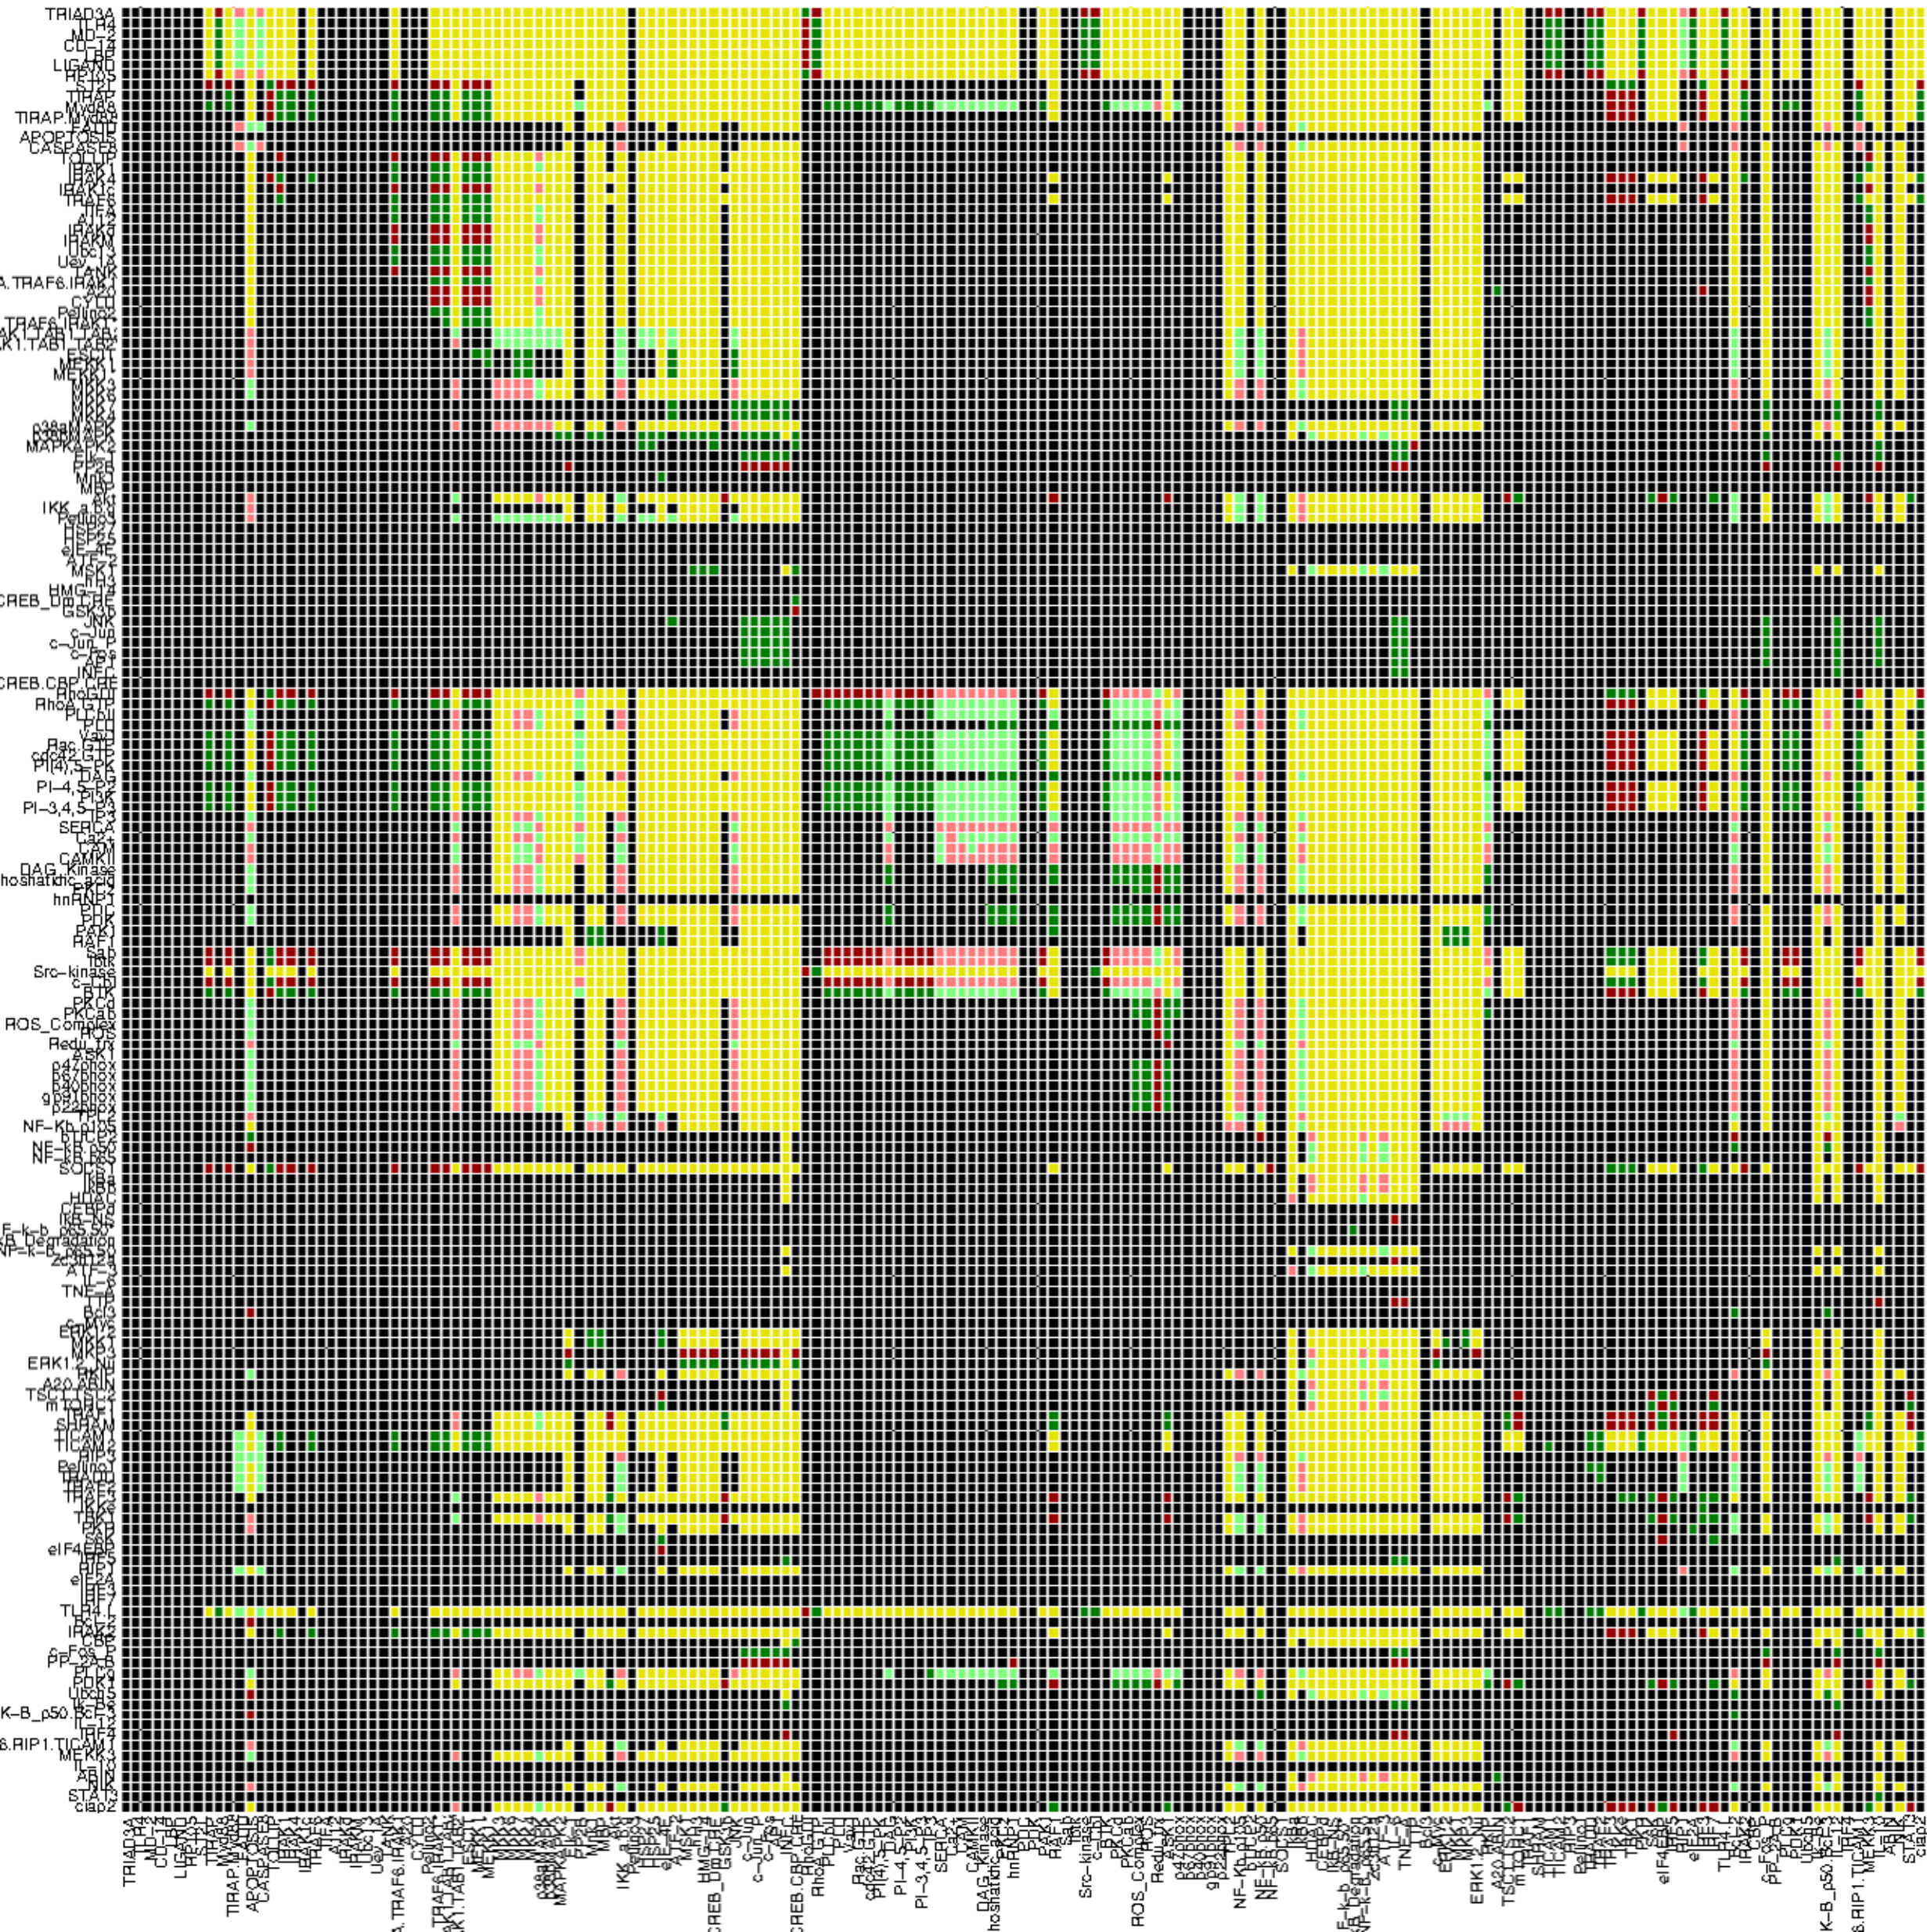

(PP1+PP2A+MKP3) -/-

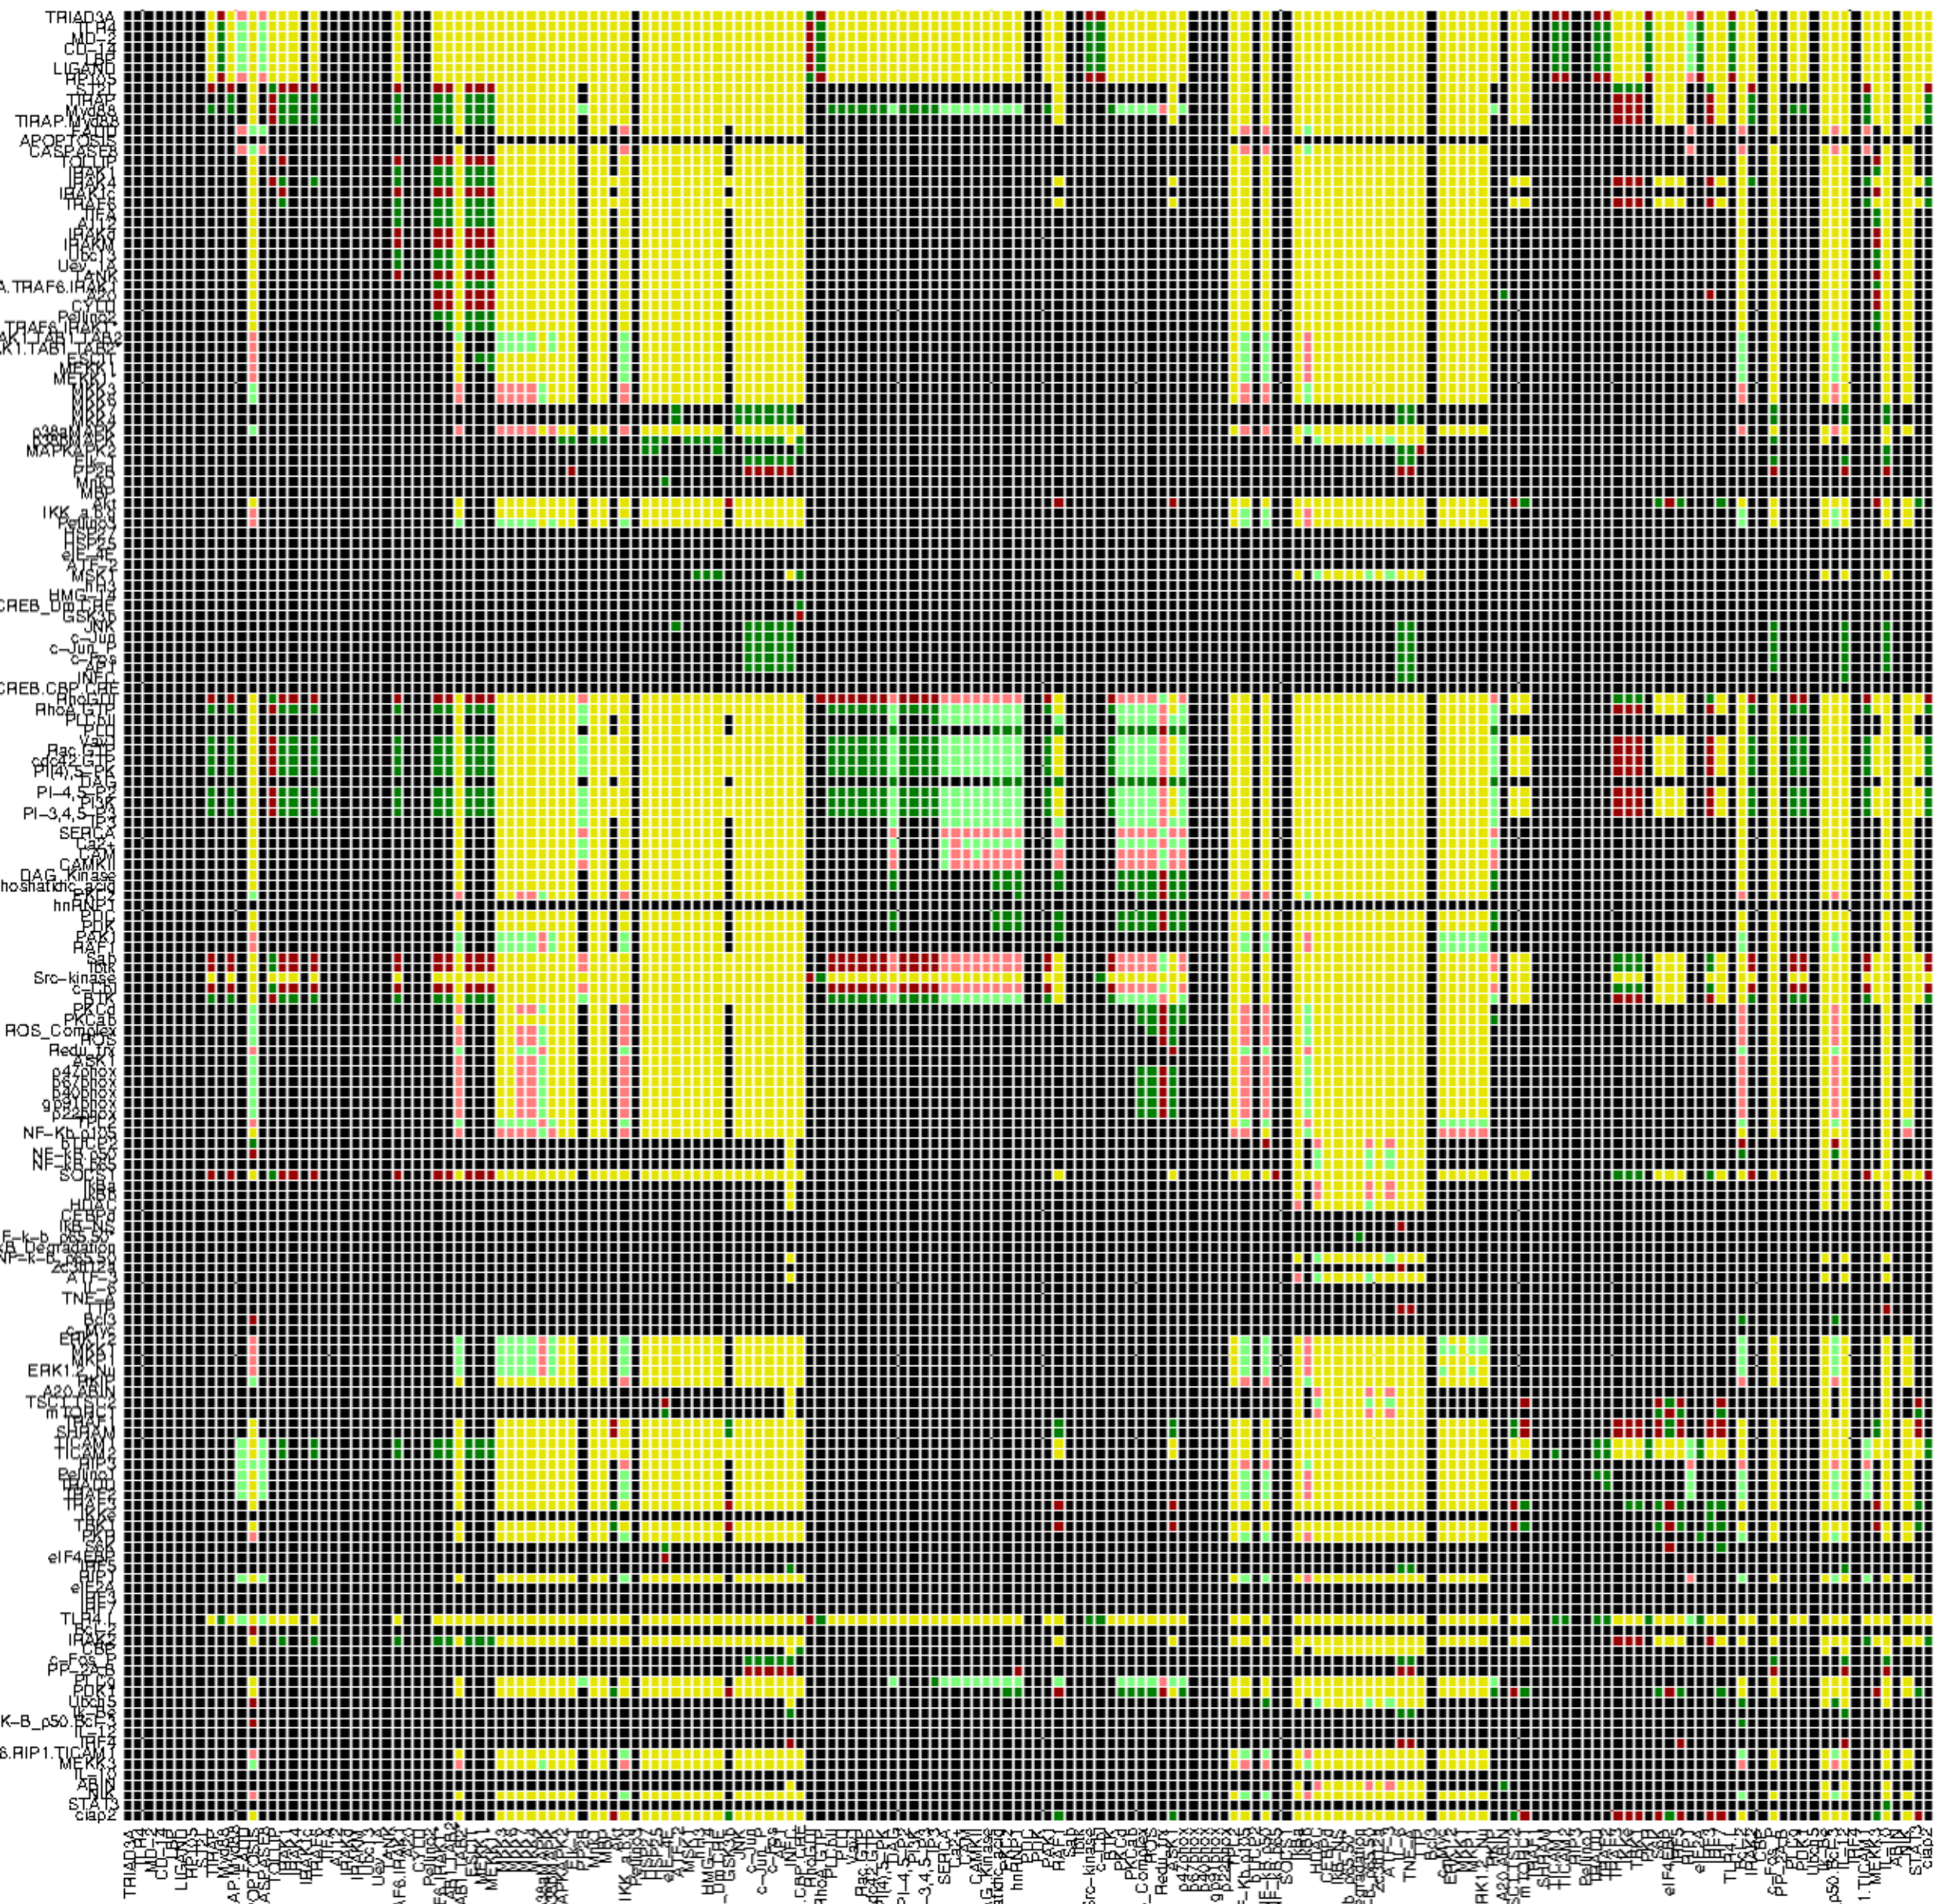

(PP2A+MKP1+MKP3) -/-

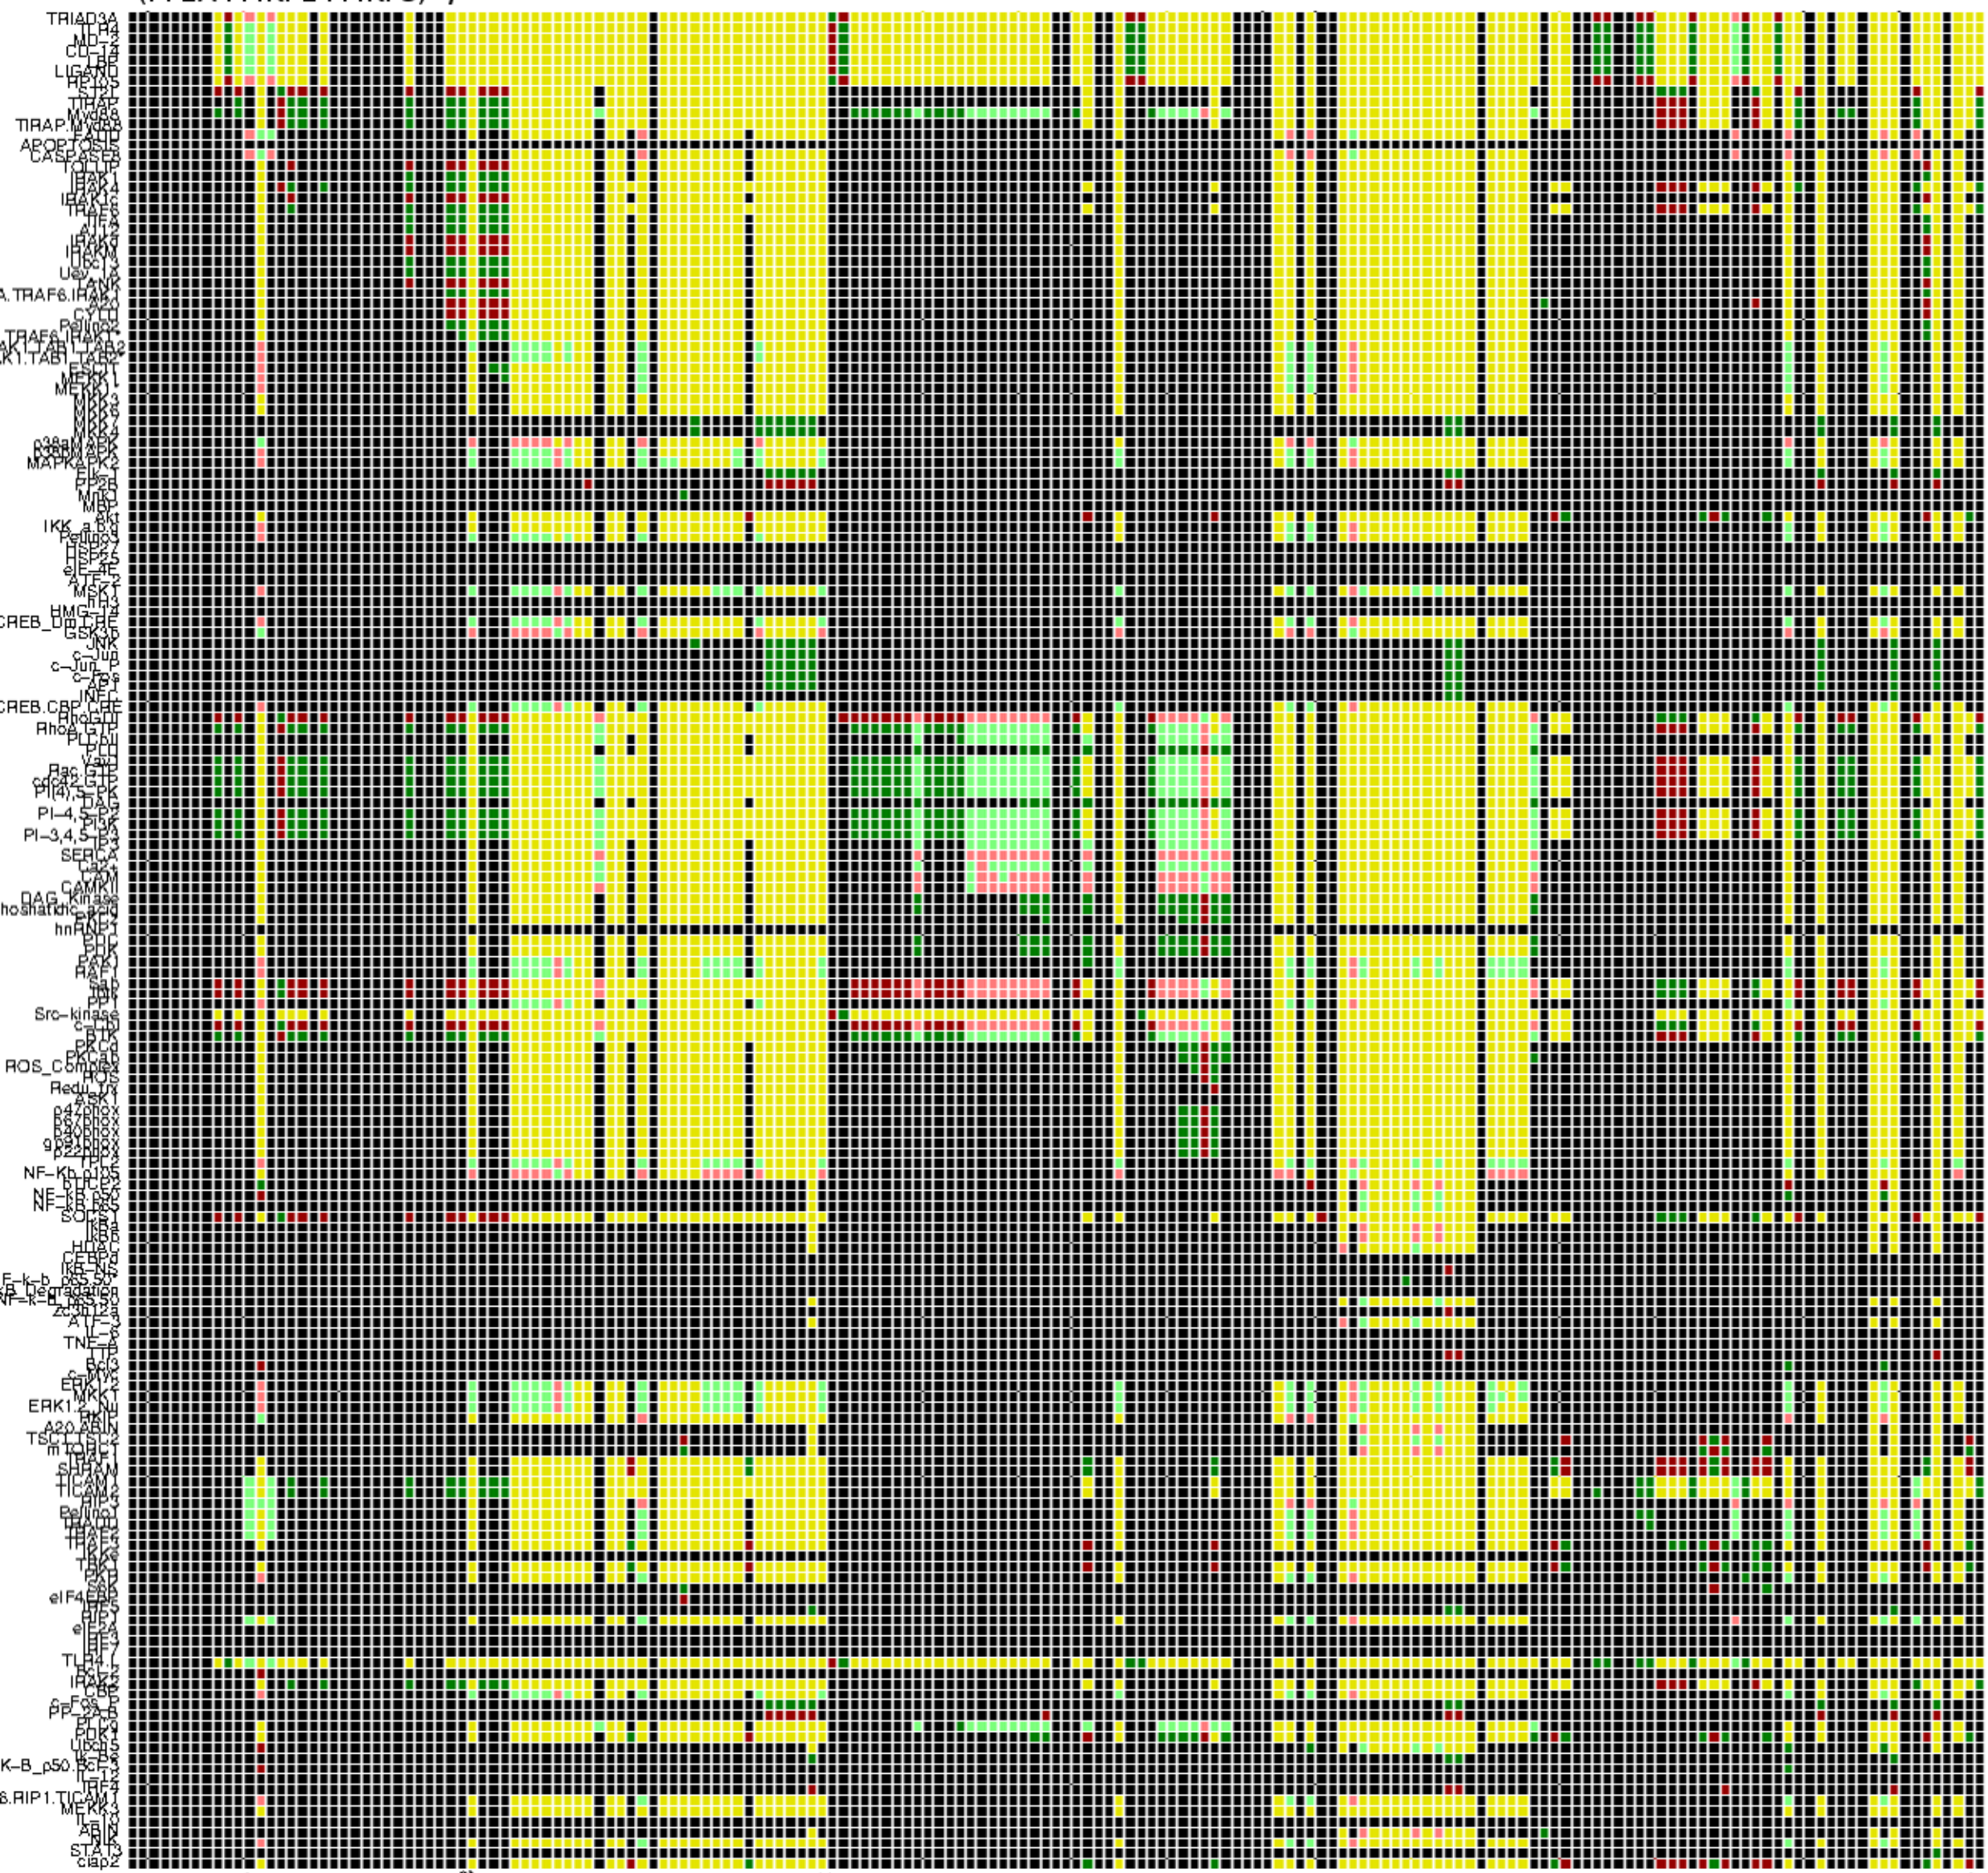

TRIAD3A  
CD147  
LIG4  
TRAP1  
ABO1  
CASP8  
TRAF6  
TRAF1  
TRAF2  
TRAF3  
TRAF4  
TRAF5  
TRAF6  
TRAF7  
TRAF8  
TRAF9  
TRAF10  
TRAF11  
TRAF12  
TRAF13  
TRAF14  
TRAF15  
TRAF16  
TRAF17  
TRAF18  
TRAF19  
TRAF20  
TRAF21  
TRAF22  
TRAF23  
TRAF24  
TRAF25  
TRAF26  
TRAF27  
TRAF28  
TRAF29  
TRAF30  
TRAF31  
TRAF32  
TRAF33  
TRAF34  
TRAF35  
TRAF36  
TRAF37  
TRAF38  
TRAF39  
TRAF40  
TRAF41  
TRAF42  
TRAF43  
TRAF44  
TRAF45  
TRAF46  
TRAF47  
TRAF48  
TRAF49  
TRAF50  
TRAF51  
TRAF52  
TRAF53  
TRAF54  
TRAF55  
TRAF56  
TRAF57  
TRAF58  
TRAF59  
TRAF60  
TRAF61  
TRAF62  
TRAF63  
TRAF64  
TRAF65  
TRAF66  
TRAF67  
TRAF68  
TRAF69  
TRAF70  
TRAF71  
TRAF72  
TRAF73  
TRAF74  
TRAF75  
TRAF76  
TRAF77  
TRAF78  
TRAF79  
TRAF80  
TRAF81  
TRAF82  
TRAF83  
TRAF84  
TRAF85  
TRAF86  
TRAF87  
TRAF88  
TRAF89  
TRAF90  
TRAF91  
TRAF92  
TRAF93  
TRAF94  
TRAF95  
TRAF96  
TRAF97  
TRAF98  
TRAF99  
TRAF100

(PP1+PP2A+MKP1+MKP3)-/-

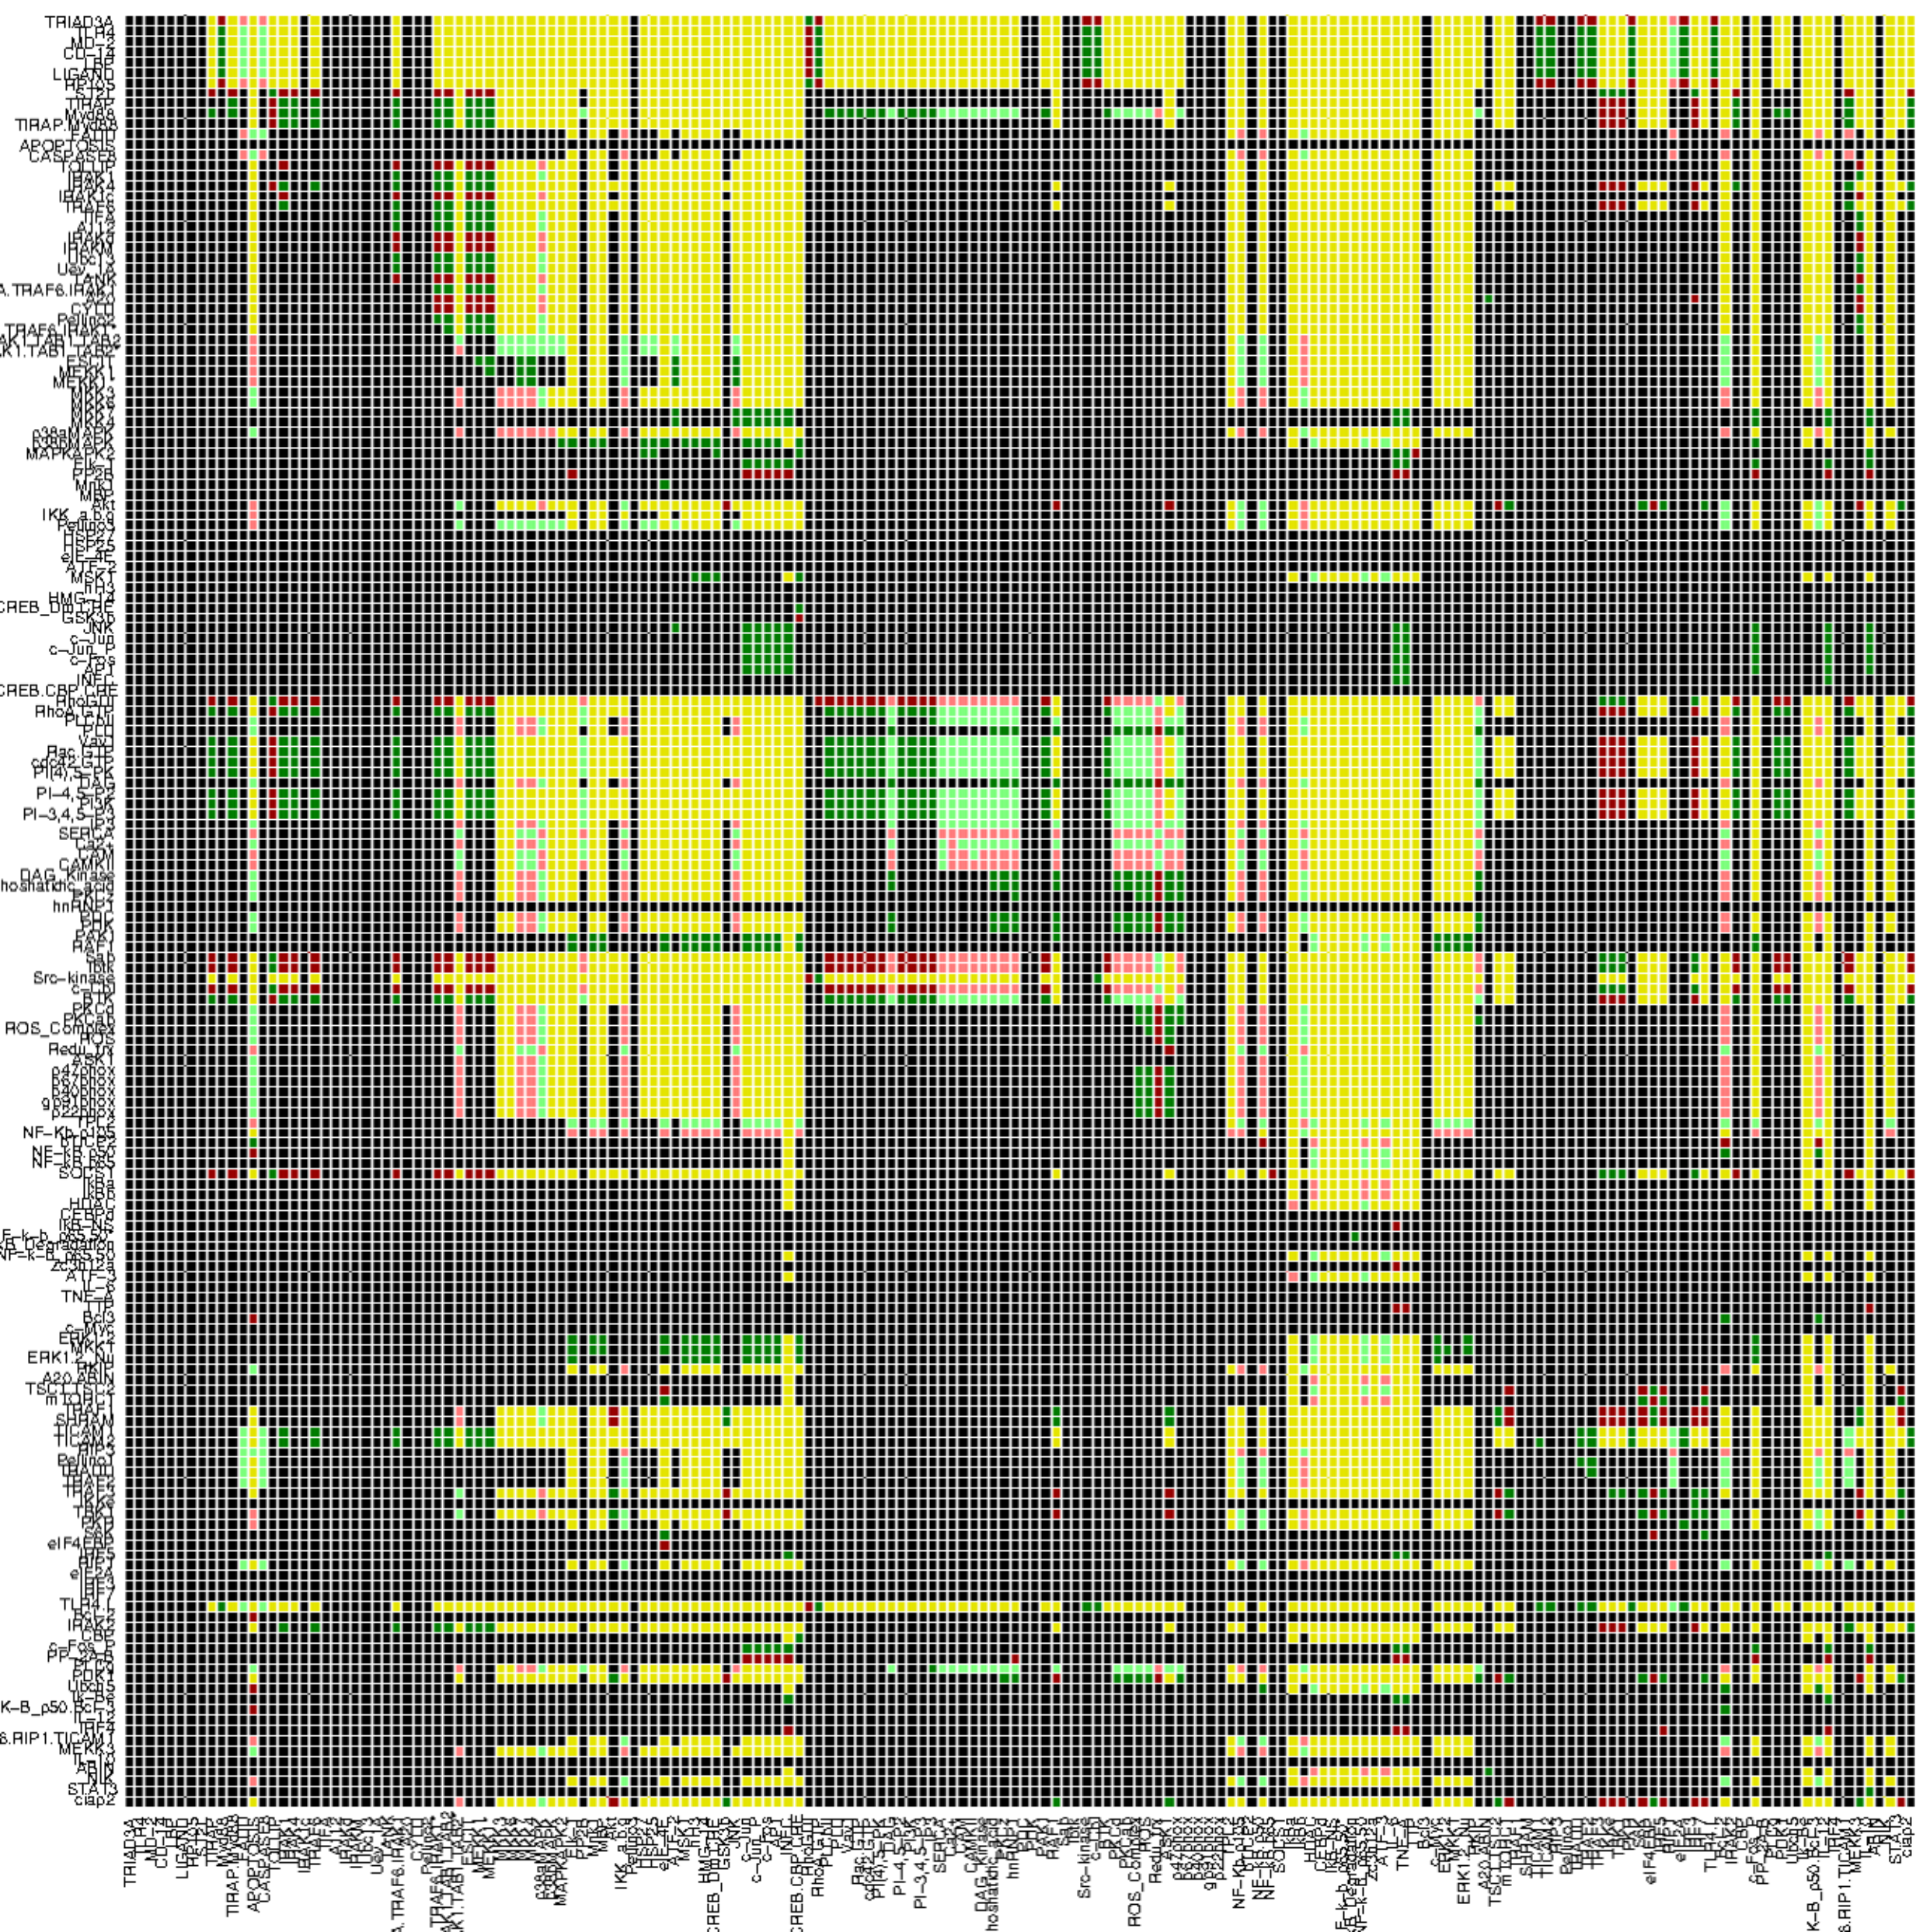



# Logical steady state in Yersinia infection.

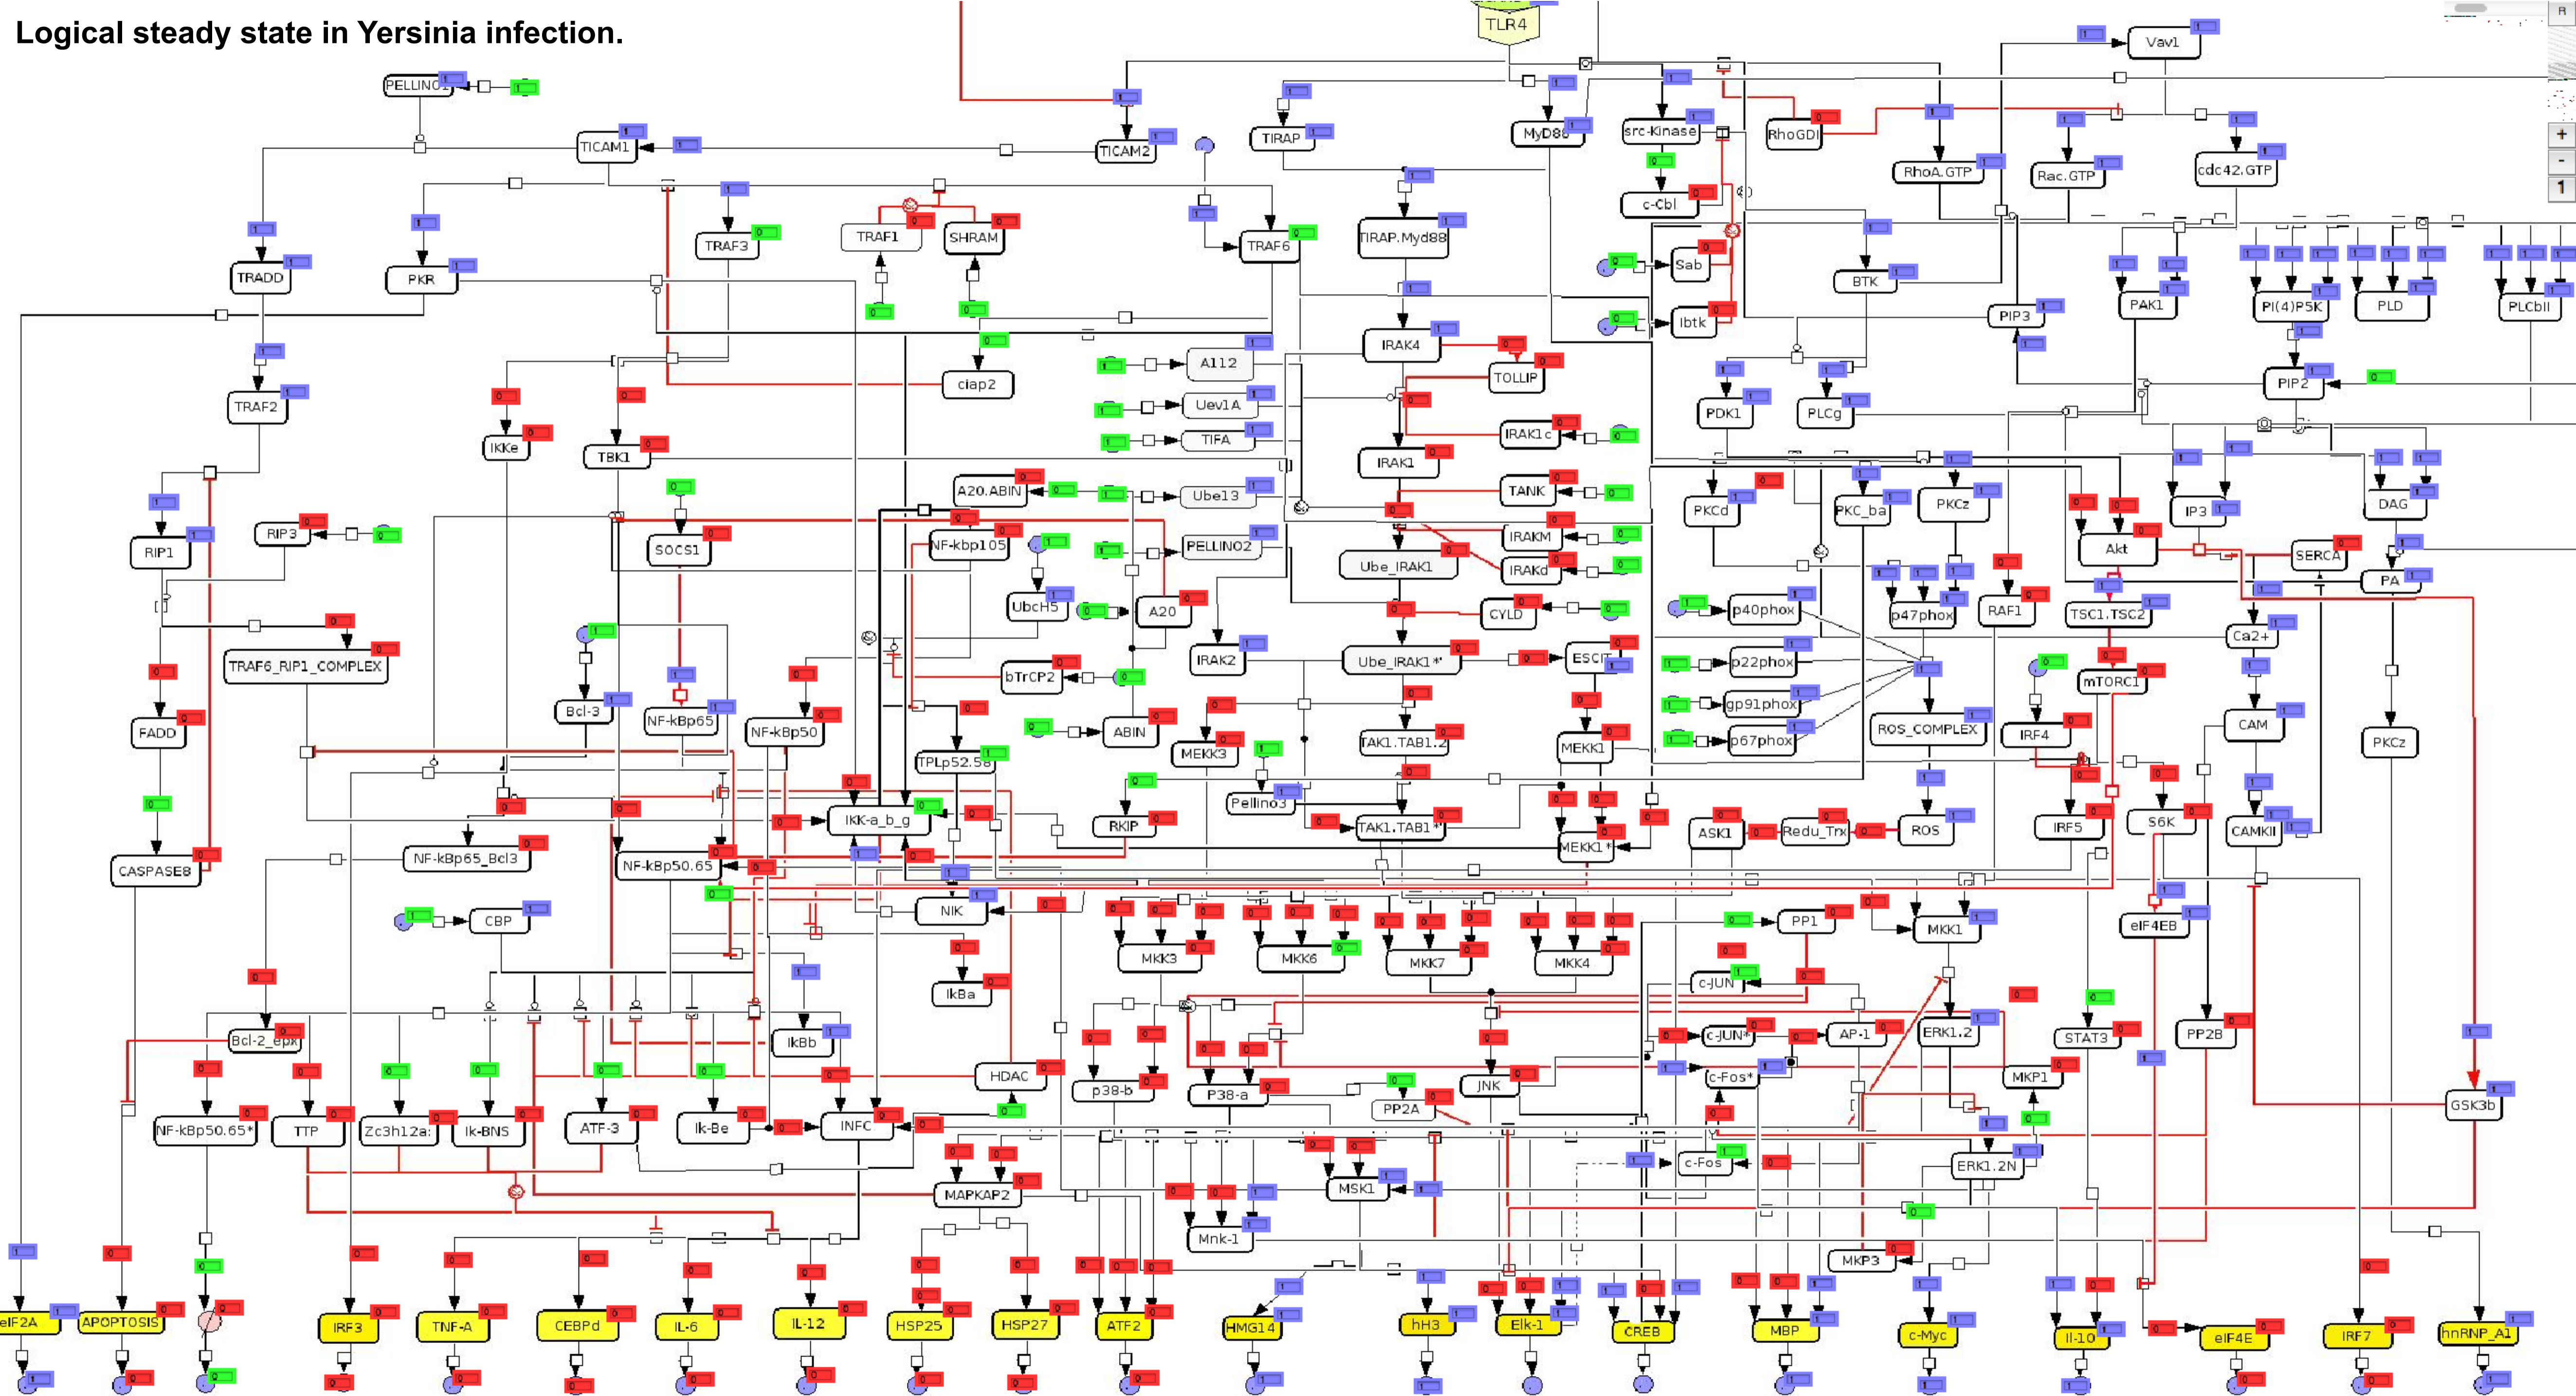

# Logical Steady state in E. coli infection

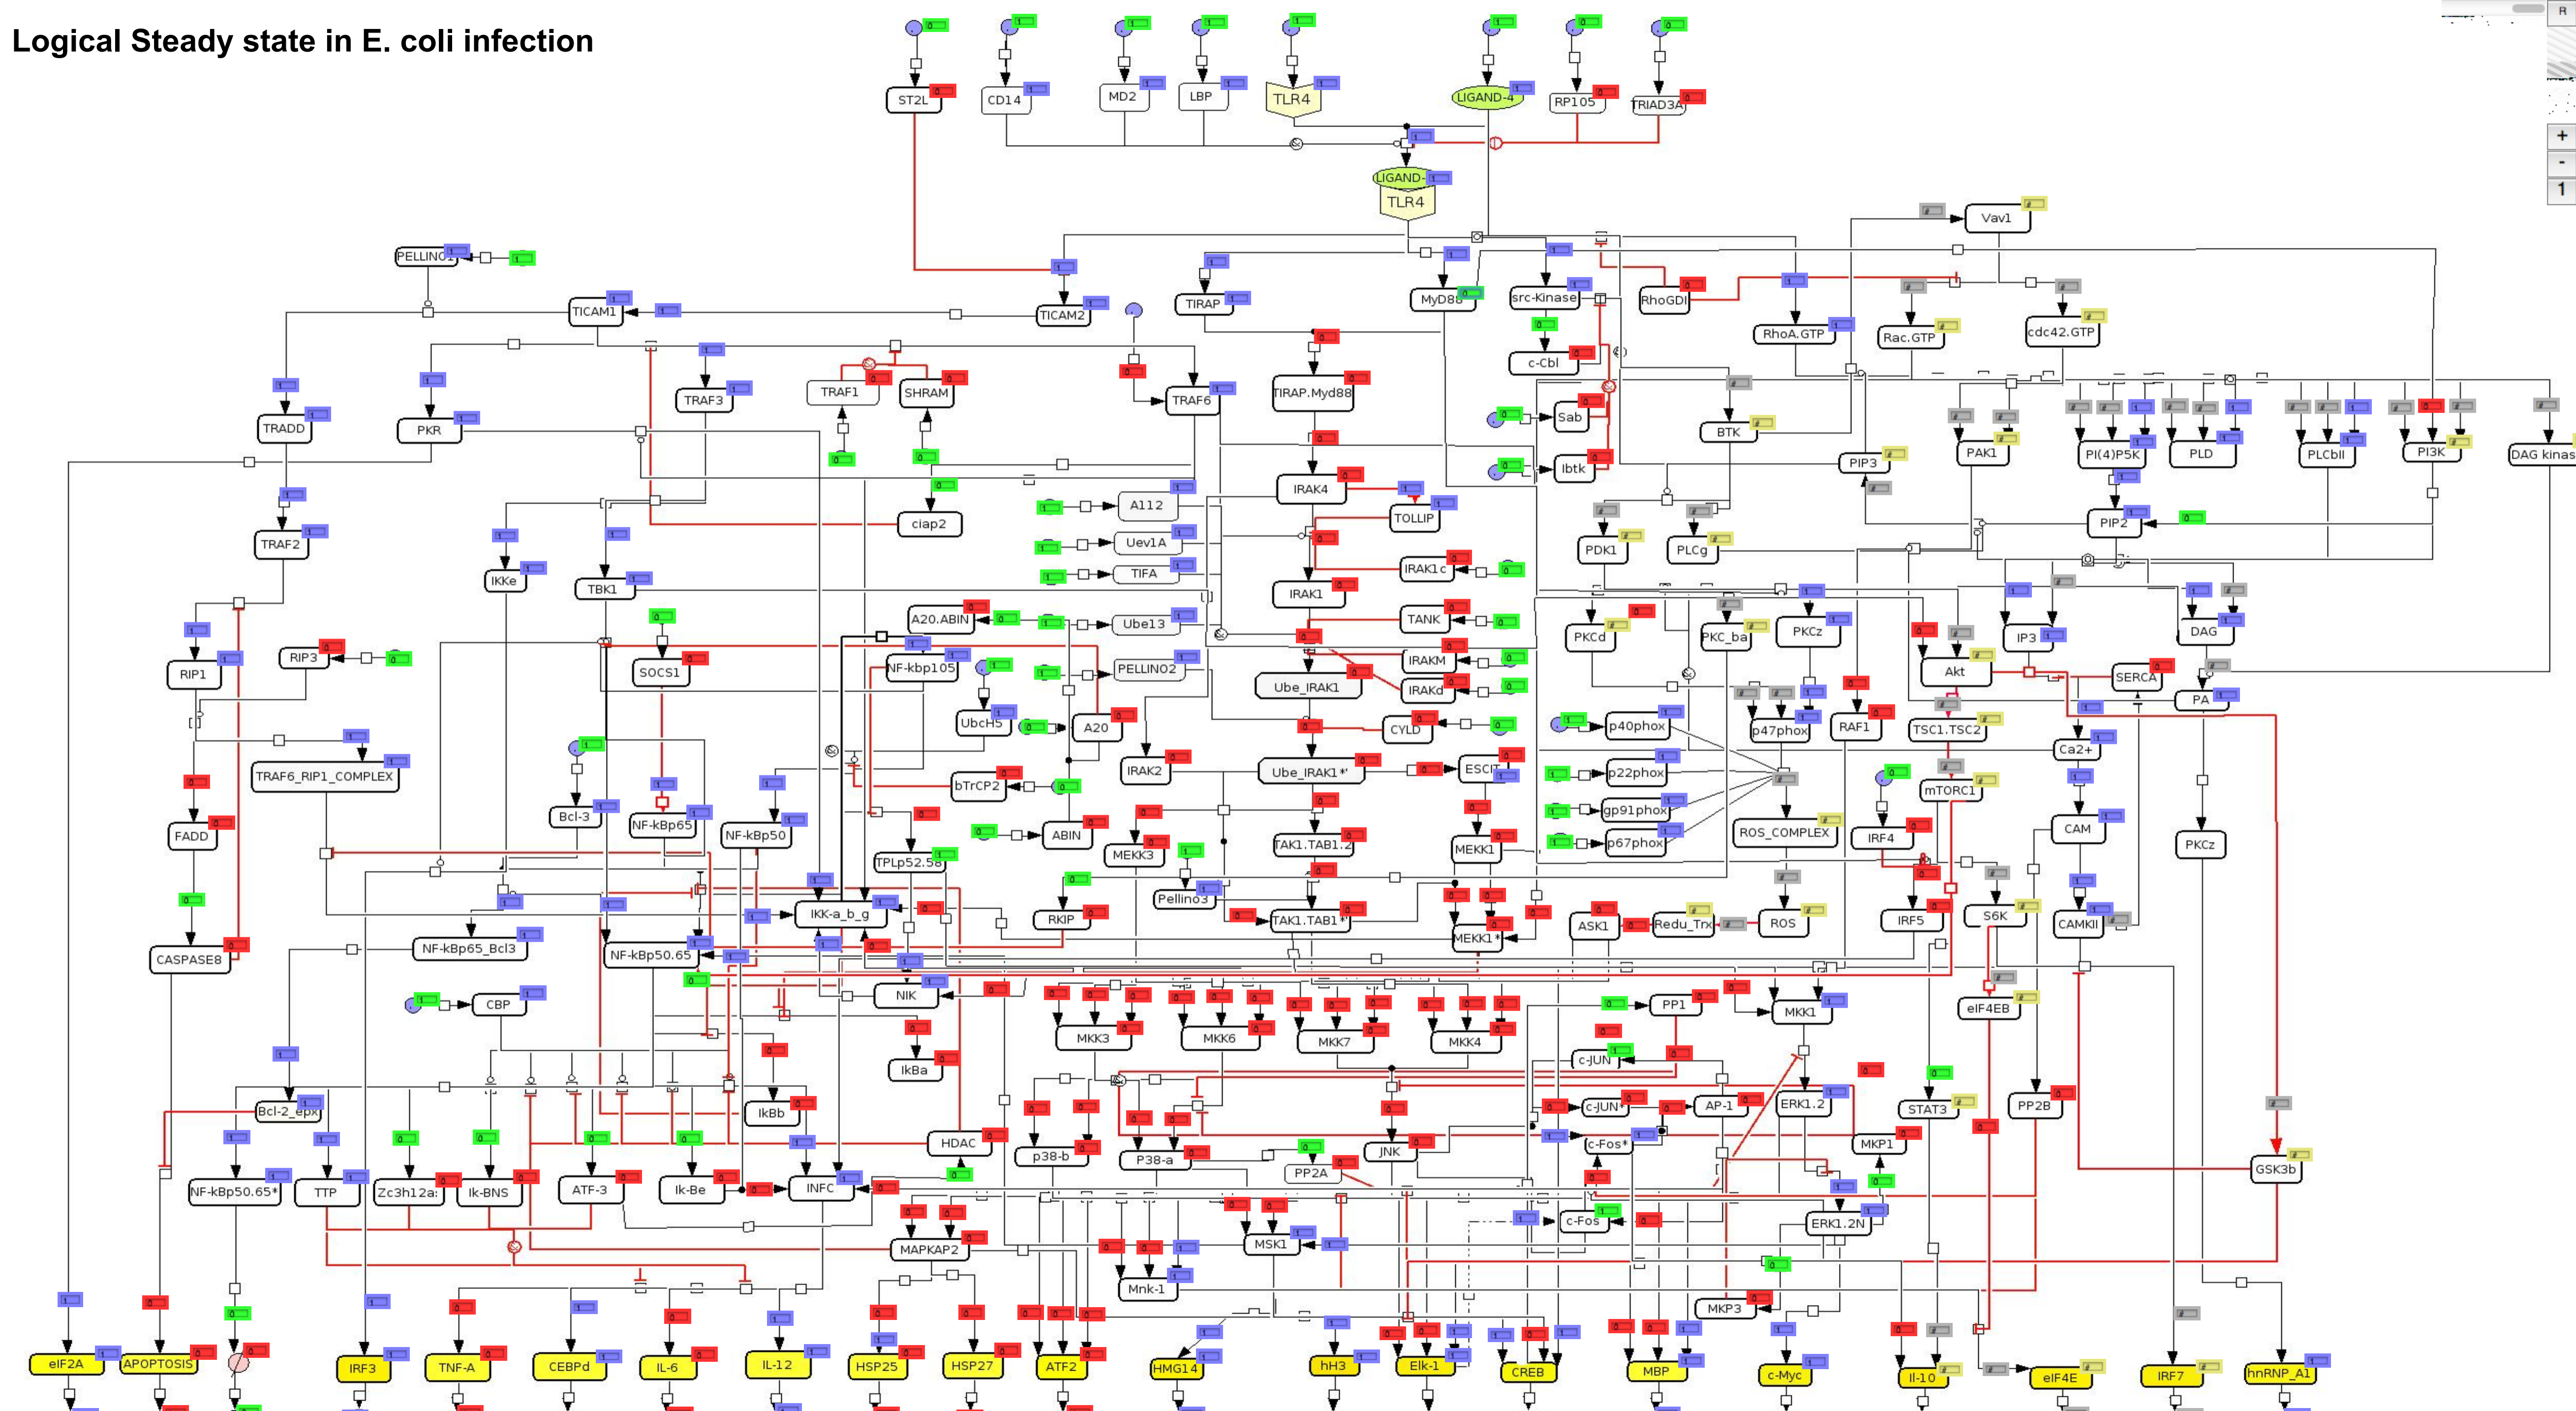

Supplement: pone.0092481.s001.pdf [file pone.0092481.s001.pdf]
